# Supplementary material for: N-Methylene-C-linked nitropyrazoles and 1,2,4-triazol-3-one: thermally stable energetic materials with reduced sensitivity
Source: Royal Society of Chemistry journal article supplement (doi:10.1039/d4dt02494j), 2024-01-01
Supplement: d4dt02494j1.pdf [file d4dt02494j1.pdf]

## **Supporting Information**

### ***N*-Methylene-C-Linked Nitropyrazoles and 1,2,4-triazolone-3-one: Thermally Stable Energetic Materials with Reduced Sensitivity**

Krishna Pandey,<sup>[a]</sup> Priyanka Das,<sup>[a]</sup> Meera Khatri,<sup>[a]</sup> and Dheeraj Kumar\*<sup>[a]</sup>

<sup>[a]</sup> Energetic Materials Laboratory, Department of Chemistry, Indian Institute of Technology Roorkee, Roorkee-247667, Uttarakhand, India.

E-mail: [dheeraj.kumar@cy.iitr.ac.in](mailto:dheeraj.kumar@cy.iitr.ac.in)

#### **Table of contents:**

|    |                             |    |
|----|-----------------------------|----|
| 1. | Crystal structure data      | 2  |
| 2. | Physical state of compounds | 8  |
| 3. | Isodesmic reactions         | 9  |
| 4. | NMR spectra                 | 10 |
| 5. | IR spectra                  | 22 |
| 6. | DSC spectra                 | 27 |
| 7. | Mass spectra                | 32 |

## 1. Crystal structure data

**Table S1 Crystal data and structure refinement for compound 3.**

|                                             |                                                               |
|---------------------------------------------|---------------------------------------------------------------|
| Identification code                         | DK_KP_CDNPBY_0464_0m (1)                                      |
| Empirical formula                           | C <sub>6</sub> H <sub>7</sub> N <sub>9</sub> O <sub>5</sub>   |
| Formula weight                              | 285.21                                                        |
| Temperature/K                               | 108.00                                                        |
| Crystal system                              | orthorhombic                                                  |
| Space group                                 | Pbca                                                          |
| a/Å                                         | 7.2377(4)                                                     |
| b/Å                                         | 7.5343(4)                                                     |
| c/Å                                         | 38.309(2)                                                     |
| α/°                                         | 90                                                            |
| β/°                                         | 90                                                            |
| γ/°                                         | 90                                                            |
| Volume/Å <sup>3</sup>                       | 2089.0(2)                                                     |
| Z                                           | 4                                                             |
| ρ <sub>calc</sub> /cm <sup>3</sup>          | 0.907                                                         |
| μ/mm <sup>-1</sup>                          | 0.079                                                         |
| F(000)                                      | 584.0                                                         |
| Crystal size/mm <sup>3</sup>                | 0.16 × 0.104 × 0.047                                          |
| Radiation                                   | MoKα (λ = 0.71073)                                            |
| 2θ range for data collection/°              | 4.252 to 54.22                                                |
| Index ranges                                | -9 ≤ h ≤ 9, -9 ≤ k ≤ 9, -49 ≤ l ≤ 49                          |
| Reflections collected                       | 29940                                                         |
| Independent reflections                     | 2311 [R <sub>int</sub> = 0.0671, R <sub>sigma</sub> = 0.0297] |
| Data/restraints/parameters                  | 2311/0/190                                                    |
| Goodness-of-fit on F <sup>2</sup>           | 1.042                                                         |
| Final R indexes [I ≥ 2σ (I)]                | R <sub>1</sub> = 0.0352, wR <sub>2</sub> = 0.0807             |
| Final R indexes [all data]                  | R <sub>1</sub> = 0.0480, wR <sub>2</sub> = 0.0874             |
| Largest diff. peak/hole / e Å <sup>-3</sup> | 0.28/-0.26                                                    |
| CCDC                                        | 2381173                                                       |

**Table S2 Fractional Atomic Coordinates (×10<sup>4</sup>) and Equivalent Isotropic Displacement Parameters (Å<sup>2</sup>×10<sup>3</sup>) for compound 3. U<sub>eq</sub> is defined as 1/3 of the trace of the orthogonalised U<sub>ij</sub> tensor.**

| Atom | x          | y          | z         | U(eq)   |
|------|------------|------------|-----------|---------|
| O1   | 8436.4(14) | 6180.0(15) | 4663.7(3) | 21.5(3) |

**Table S2 Fractional Atomic Coordinates ( $\times 10^4$ ) and Equivalent Isotropic Displacement Parameters ( $\text{\AA}^2 \times 10^3$ ) for compound 3.  $U_{\text{eq}}$  is defined as 1/3 of the trace of the orthogonalised  $U_{ij}$  tensor.**

| Atom | <i>x</i>   | <i>y</i>   | <i>z</i>  | $U(\text{eq})$ |
|------|------------|------------|-----------|----------------|
| O2   | 5746.5(15) | 6999.9(15) | 4860.5(3) | 23.0(3)        |
| O3   | 757.0(14)  | 3656.3(15) | 4002.2(3) | 20.3(3)        |
| O4   | 2463.9(15) | 2208.0(15) | 3627.9(3) | 21.2(3)        |
| O5   | 4086.8(15) | 2973.8(14) | 2486.8(3) | 19.9(3)        |
| N1   | 5635.5(15) | 3484.6(16) | 3951.3(3) | 12.1(3)        |
| N2   | 6837.8(16) | 4290.4(17) | 4157.1(3) | 13.1(3)        |
| N3   | 6740.9(17) | 6169.7(17) | 4653.2(3) | 16.0(3)        |
| N4   | 2490.5(17) | 5615.0(18) | 4533.0(3) | 18.2(3)        |
| N5   | 2279.7(17) | 3198.4(18) | 3882.3(3) | 15.7(3)        |
| N6   | 6133.7(17) | 4798.3(17) | 3228.7(3) | 15.9(3)        |
| N7   | 5436.1(18) | 4899.6(18) | 2892.4(3) | 16.9(3)        |
| N8   | 5083.8(17) | 2197.7(17) | 3051.2(3) | 14.8(3)        |
| N9   | 4517.8(19) | 419.9(18)  | 3077.3(4) | 18.9(3)        |
| C1   | 5825(2)    | 5160(2)    | 4392.5(4) | 13.2(3)        |
| C2   | 3897(2)    | 4941(2)    | 4348.1(4) | 13.6(3)        |
| C3   | 3850.0(19) | 3845(2)    | 4054.8(4) | 13.4(3)        |
| C4   | 6347(2)    | 2383(2)    | 3665.3(3) | 13.7(3)        |
| C5   | 5869.0(19) | 3156(2)    | 3317.9(4) | 13.5(3)        |
| C6   | 4804(2)    | 3328(2)    | 2774.3(4) | 15.4(3)        |

**Table S3 Anisotropic Displacement Parameters ( $\text{\AA}^2 \times 10^3$ ) for compound 3. The Anisotropic displacement factor exponent takes the form:  $-2\pi^2[h^2a^*U_{11}+2hka^*b^*U_{12}+\dots]$ .**

| Atom | $U_{11}$ | $U_{22}$ | $U_{33}$ | $U_{23}$ | $U_{13}$ | $U_{12}$ |
|------|----------|----------|----------|----------|----------|----------|
| O1   | 15.8(5)  | 27.7(7)  | 21.1(6)  | -4.1(5)  | -2.8(4)  | -2.3(5)  |
| O2   | 26.7(6)  | 24.0(7)  | 18.4(6)  | -8.6(5)  | 2.2(5)   | 4.7(5)   |
| O3   | 10.1(5)  | 25.7(7)  | 25.1(6)  | 2.6(5)   | 1.9(4)   | 2.2(5)   |
| O4   | 18.1(5)  | 25.0(7)  | 20.6(6)  | -6.9(5)  | -0.9(5)  | -2.2(5)  |
| O5   | 27.8(6)  | 17.8(6)  | 14.2(5)  | -1.1(5)  | -7.4(4)  | 1.2(5)   |
| N1   | 11.5(6)  | 14.0(6)  | 10.9(6)  | 0.0(5)   | 0.0(5)   | -0.2(5)  |
| N2   | 13.2(6)  | 14.7(7)  | 11.3(6)  | 0.4(5)   | -0.7(5)  | -1.1(5)  |
| N3   | 19.1(6)  | 15.4(7)  | 13.4(6)  | 0.3(5)   | 0.5(5)   | 1.0(5)   |
| N4   | 14.8(6)  | 21.8(7)  | 17.9(6)  | -1.8(6)  | 3.2(5)   | 3.6(6)   |
| N5   | 13.3(6)  | 16.8(7)  | 17.1(6)  | 3.8(6)   | 0.0(5)   | -0.3(5)  |
| N6   | 18.6(6)  | 17.5(7)  | 11.5(6)  | -0.5(5)  | -1.2(5)  | -0.3(5)  |
| N7   | 24.0(7)  | 13.1(7)  | 13.7(7)  | 0.4(6)   | -2.4(5)  | -1.0(6)  |
| N8   | 18.7(6)  | 12.4(7)  | 13.2(6)  | -0.7(5)  | -1.5(5)  | -1.3(5)  |

**Table S3 Anisotropic Displacement Parameters ( $\text{\AA}^2 \times 10^3$ ) for compound 3. The Anisotropic displacement factor exponent takes the form:  $-2\pi^2[h^2a^{*2}U_{11}+2hka^*b^*U_{12}+\dots]$ .**

| Atom | U <sub>11</sub> | U <sub>22</sub> | U <sub>33</sub> | U <sub>23</sub> | U <sub>13</sub> | U <sub>12</sub> |
|------|-----------------|-----------------|-----------------|-----------------|-----------------|-----------------|
| N9   | 23.7(7)         | 12.5(7)         | 20.5(7)         | -0.8(6)         | -2.5(6)         | -3.9(6)         |
| C1   | 14.2(7)         | 13.3(7)         | 12.1(7)         | 0.2(6)          | -0.1(5)         | 1.0(6)          |
| C2   | 14.4(7)         | 12.8(7)         | 13.6(7)         | 4.0(6)          | 1.6(6)          | 1.7(6)          |
| C3   | 10.8(7)         | 14.5(8)         | 14.9(7)         | 3.4(6)          | 0.2(5)          | -0.8(6)         |
| C4   | 13.2(6)         | 14.6(8)         | 13.3(7)         | -1.9(6)         | 1.1(5)          | 1.2(6)          |
| C5   | 11.3(7)         | 15.8(8)         | 13.3(7)         | -1.5(6)         | 1.0(5)          | 0.8(6)          |
| C6   | 17.0(7)         | 15.3(8)         | 13.9(7)         | -0.9(6)         | 0.0(6)          | 2.6(6)          |

**Table S4 Bond Lengths for compound 3.**

| Atom | Atom | Length/ $\text{\AA}$ | Atom | Atom | Length/ $\text{\AA}$ |
|------|------|----------------------|------|------|----------------------|
| O1   | N3   | 1.2278(16)           | N5   | C3   | 1.4022(19)           |
| O2   | N3   | 1.2409(16)           | N6   | N7   | 1.3857(17)           |
| O3   | N5   | 1.2428(16)           | N6   | C5   | 1.2982(19)           |
| O4   | N5   | 1.2346(16)           | N7   | C6   | 1.348(2)             |
| O5   | C6   | 1.2465(18)           | N8   | N9   | 1.4043(18)           |
| N1   | N2   | 1.3219(16)           | N8   | C5   | 1.3740(18)           |
| N1   | C3   | 1.3789(18)           | N8   | C6   | 1.3754(19)           |
| N1   | C4   | 1.4675(18)           | C1   | C2   | 1.415(2)             |
| N2   | C1   | 1.3340(18)           | C2   | C3   | 1.395(2)             |
| N3   | C1   | 1.4198(19)           | C5   | C4   | 1.4930(19)           |
| N4   | C2   | 1.3403(19)           |      |      |                      |

**Table S5 Crystal data and structure refinement for compound 8.**

|                                             |                                                               |
|---------------------------------------------|---------------------------------------------------------------|
| Identification code                         | dk_kp_tzno_0666_0m                                            |
| Empirical formula                           | C <sub>6</sub> H <sub>6</sub> N <sub>8</sub> O <sub>6</sub>   |
| Formula weight                              | 286.19                                                        |
| Temperature/K                               | 100.00                                                        |
| Crystal system                              | monoclinic                                                    |
| Space group                                 | P2 <sub>1</sub>                                               |
| a/Å                                         | 8.4322(6)                                                     |
| b/Å                                         | 6.1733(4)                                                     |
| c/Å                                         | 10.2585(7)                                                    |
| α/°                                         | 90                                                            |
| β/°                                         | 103.420(2)                                                    |
| γ/°                                         | 90                                                            |
| Volume/Å <sup>3</sup>                       | 519.42(6)                                                     |
| Z                                           | 2                                                             |
| ρ <sub>calc</sub> /cm <sup>3</sup>          | 1.830                                                         |
| μ/mm <sup>-1</sup>                          | 0.163                                                         |
| F(000)                                      | 292.0                                                         |
| Crystal size/mm <sup>3</sup>                | 0.58 × 0.33 × 0.144                                           |
| Radiation                                   | MoKα (λ = 0.71073)                                            |
| 2θ range for data collection/°              | 4.082 to 53.63                                                |
| Index ranges                                | -10 ≤ h ≤ 10, -7 ≤ k ≤ 7, -12 ≤ l ≤ 12                        |
| Reflections collected                       | 13652                                                         |
| Independent reflections                     | 2208 [R <sub>int</sub> = 0.0397, R <sub>sigma</sub> = 0.0214] |
| Data/restraints/parameters                  | 2208/1/193                                                    |
| Goodness-of-fit on F <sup>2</sup>           | 1.069                                                         |
| Final R indexes [I ≥ 2σ (I)]                | R <sub>1</sub> = 0.0259, wR <sub>2</sub> = 0.0638             |
| Final R indexes [all data]                  | R <sub>1</sub> = 0.0266, wR <sub>2</sub> = 0.0642             |
| Largest diff. peak/hole / e Å <sup>-3</sup> | 0.24/-0.17                                                    |
| Flack parameter                             | 0.3(4)                                                        |
| CCDC                                        | 2381172                                                       |

**Table S6 Fractional Atomic Coordinates (×10<sup>4</sup>) and Equivalent Isotropic Displacement Parameters (Å<sup>2</sup>×10<sup>3</sup>) for compound 8. U<sub>eq</sub> is defined as 1/3 of the trace of the orthogonalised U<sub>ij</sub> tensor.**

| Atom | x          | y       | z          | U(eq)   |
|------|------------|---------|------------|---------|
| O1   | 1692.9(18) | -106(3) | 4623.0(14) | 23.0(3) |

**Table S6 Fractional Atomic Coordinates ( $\times 10^4$ ) and Equivalent Isotropic Displacement Parameters ( $\text{\AA}^2 \times 10^3$ ) for compound 8.  $U_{\text{eq}}$  is defined as 1/3 of the trace of the orthogonalised  $U_{ij}$  tensor.**

| Atom | <i>x</i>   | <i>y</i> | <i>z</i>   | $U(\text{eq})$ |
|------|------------|----------|------------|----------------|
| O2   | 365.3(19)  | -502(3)  | 6189.0(15) | 24.8(4)        |
| O3   | 1108.1(19) | 2483(3)  | 8468.7(15) | 20.7(3)        |
| O4   | 2928(2)    | 5917(3)  | 9879.8(15) | 27.2(4)        |
| O5   | 3779(2)    | 8294(3)  | 8628.9(17) | 28.5(4)        |
| O6   | 9932.7(17) | 8834(2)  | 8902.2(13) | 19.6(3)        |
| N1   | 3535.3(19) | 5178(3)  | 6629.2(15) | 16.4(3)        |
| N2   | 3075(2)    | 3544(3)  | 5790.9(16) | 16.8(4)        |
| N3   | 1343.5(19) | 462(3)   | 5667.8(16) | 16.6(4)        |
| N4   | 3230(2)    | 6510(3)  | 8828.5(18) | 20.4(4)        |
| N5   | 6869(2)    | 4987(3)  | 7970.5(16) | 17.2(3)        |
| N6   | 8392(2)    | 5653(3)  | 8678.5(17) | 17.5(4)        |
| N7   | 7309(2)    | 8397(3)  | 7531.0(16) | 14.8(3)        |
| N8   | 6936(2)    | 10481(3) | 7018.6(17) | 17.9(4)        |
| C1   | 2105(2)    | 2338(3)  | 6359(2)    | 15.7(4)        |
| C2   | 1945(2)    | 3142(4)  | 7609(2)    | 16.5(4)        |
| C3   | 2901(2)    | 4993(3)  | 7742.3(19) | 17.2(4)        |
| C4   | 4662(2)    | 6774(3)  | 6302(2)    | 17.4(4)        |
| C5   | 6273(2)    | 6669(3)  | 7284.5(18) | 15.2(4)        |
| C6   | 8697(2)    | 7737(3)  | 8436.7(19) | 16.0(4)        |

**Table S7 Anisotropic Displacement Parameters ( $\text{\AA}^2 \times 10^3$ ) for compound 8. The Anisotropic displacement factor exponent takes the form: -  $2\pi^2[h^2a^*U_{11}+2hka^*b^*U_{12}+\dots]$ .**

| Atom | $U_{11}$ | $U_{22}$ | $U_{33}$ | $U_{23}$ | $U_{13}$ | $U_{12}$ |
|------|----------|----------|----------|----------|----------|----------|
| O1   | 27.2(8)  | 24.6(8)  | 18.6(7)  | -5.6(7)  | 8.3(6)   | -2.8(7)  |
| O2   | 27.7(8)  | 25.1(8)  | 22.9(8)  | -2.0(6)  | 8.6(6)   | -10.7(7) |
| O3   | 26.7(8)  | 18.7(8)  | 19.4(7)  | -2.1(6)  | 10.8(6)  | -5.7(6)  |
| O4   | 36.9(9)  | 27.5(8)  | 18.6(7)  | -4.8(6)  | 9.2(6)   | -4.8(7)  |
| O5   | 33.9(9)  | 19.0(8)  | 35.9(9)  | -8.1(7)  | 14.9(7)  | -9.3(7)  |
| O6   | 19.7(7)  | 22.8(8)  | 15.2(6)  | -0.2(6)  | 1.8(5)   | -6.2(6)  |
| N1   | 16.2(7)  | 17.7(9)  | 14.3(7)  | 0.3(7)   | 1.7(6)   | -1.7(7)  |
| N2   | 14.3(7)  | 18.5(9)  | 16.5(8)  | -1.3(7)  | 1.3(6)   | -2.6(7)  |
| N3   | 15.8(7)  | 17.4(9)  | 15.5(8)  | -0.8(7)  | 1.7(6)   | -1.6(7)  |
| N4   | 20.3(8)  | 19.8(9)  | 21.2(8)  | -3.4(7)  | 5.1(6)   | -0.6(7)  |
| N5   | 19.4(8)  | 16.1(8)  | 14.6(7)  | -0.5(7)  | 0.6(6)   | -1.5(7)  |
| N6   | 18.6(8)  | 16.1(8)  | 15.4(8)  | 1.6(7)   | -1.3(6)  | 1.2(7)   |
| N7   | 17.1(8)  | 13.6(8)  | 13.2(7)  | 0.3(6)   | 2.5(6)   | -0.6(6)  |

**Table S7 Anisotropic Displacement Parameters ( $\text{\AA}^2 \times 10^3$ ) for compound 8. The Anisotropic displacement factor exponent takes the form: -  $2\pi^2[h^2a^{*2}U_{11}+2hka^*b^*U_{12}+\dots]$ .**

| Atom | U <sub>11</sub> | U <sub>22</sub> | U <sub>33</sub> | U <sub>23</sub> | U <sub>13</sub> | U <sub>12</sub> |
|------|-----------------|-----------------|-----------------|-----------------|-----------------|-----------------|
| N8   | 23.6(9)         | 11.8(8)         | 18.0(8)         | 1.8(7)          | 4.1(7)          | -0.5(7)         |
| C1   | 13.7(9)         | 17.8(9)         | 14.6(9)         | 0.4(8)          | 1.5(7)          | -0.5(7)         |
| C2   | 16.2(8)         | 17.0(9)         | 15.6(9)         | 0.5(7)          | 2.1(7)          | 0.8(8)          |
| C3   | 17.3(9)         | 18.1(10)        | 15.7(8)         | -0.5(8)         | 3.1(7)          | 0.1(8)          |
| C4   | 15.1(9)         | 18.1(10)        | 17.6(9)         | 4.0(8)          | 1.4(7)          | -2.8(8)         |
| C5   | 17.7(9)         | 14.9(9)         | 13.5(8)         | -2.2(7)         | 5.2(7)          | -1.5(7)         |
| C6   | 18.6(9)         | 19.3(10)        | 10.2(8)         | -0.9(7)         | 3.6(7)          | -0.9(8)         |

**Table S8 Bond Lengths for compound 8.**

| Atom | Atom | Length/ $\text{\AA}$ | Atom | Atom | Length/ $\text{\AA}$ |
|------|------|----------------------|------|------|----------------------|
| O1   | N3   | 1.227(2)             | N4   | C3   | 1.433(3)             |
| O2   | N3   | 1.235(2)             | N5   | N6   | 1.383(2)             |
| O3   | C2   | 1.316(3)             | N5   | C5   | 1.290(3)             |
| O4   | N4   | 1.220(3)             | N6   | C6   | 1.346(3)             |
| O5   | N4   | 1.230(3)             | N7   | N8   | 1.398(2)             |
| O6   | C6   | 1.242(3)             | N7   | C5   | 1.365(3)             |
| N1   | N2   | 1.324(2)             | N7   | C6   | 1.376(3)             |
| N1   | C3   | 1.373(2)             | C1   | C2   | 1.410(3)             |
| N1   | C4   | 1.461(3)             | C2   | C3   | 1.387(3)             |
| N2   | C1   | 1.335(3)             | C4   | C5   | 1.493(3)             |
| N3   | C1   | 1.430(3)             |      |      |                      |

**2. Physical state of compounds 3-13:**

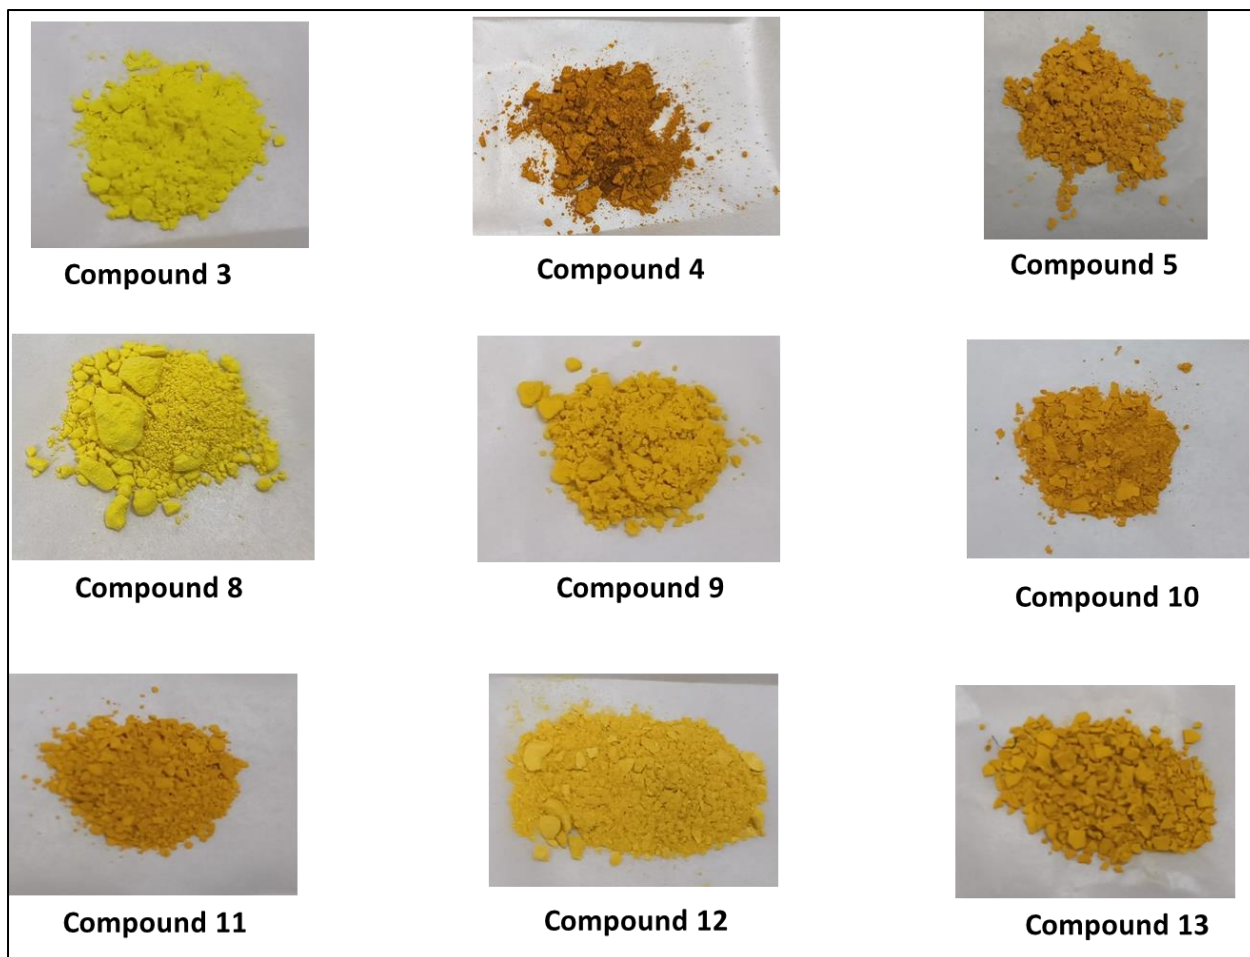

**Figure S1.** Physical state of compounds 3-13.



#### 4. Isodesmic reactions:

##### Compound 3:

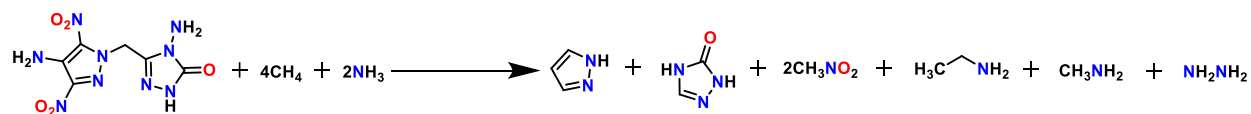

##### Compound 4:

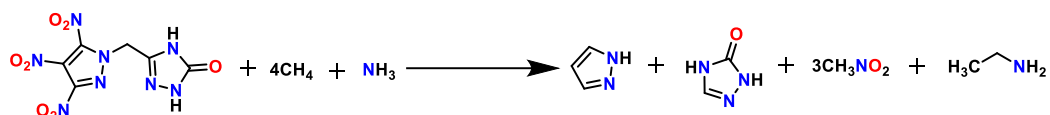

##### Compound 5:

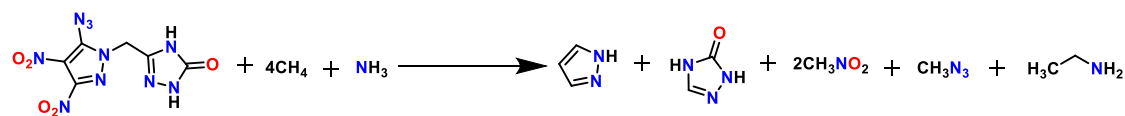

##### Compound 8:

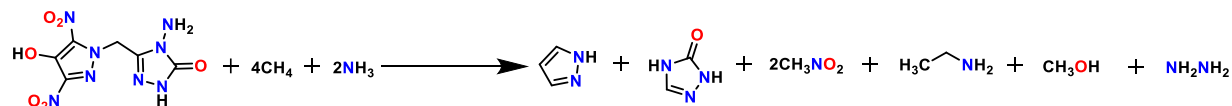

##### Anion for compounds 8-13:

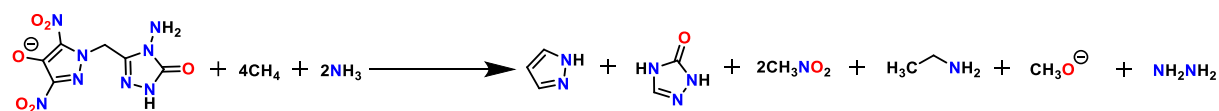

## 5. NMR Result:

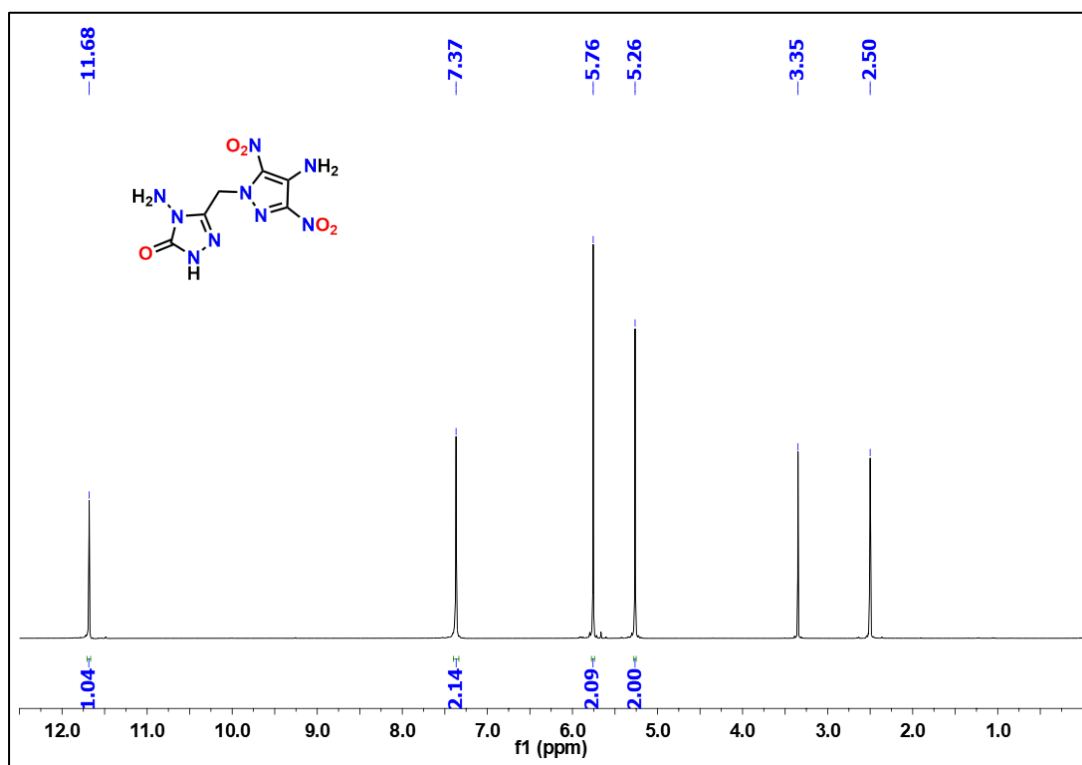

Figure S2. <sup>1</sup>H NMR Spectrum of compound **3** in DMSO-*d*<sub>6</sub> at 500 MHz.

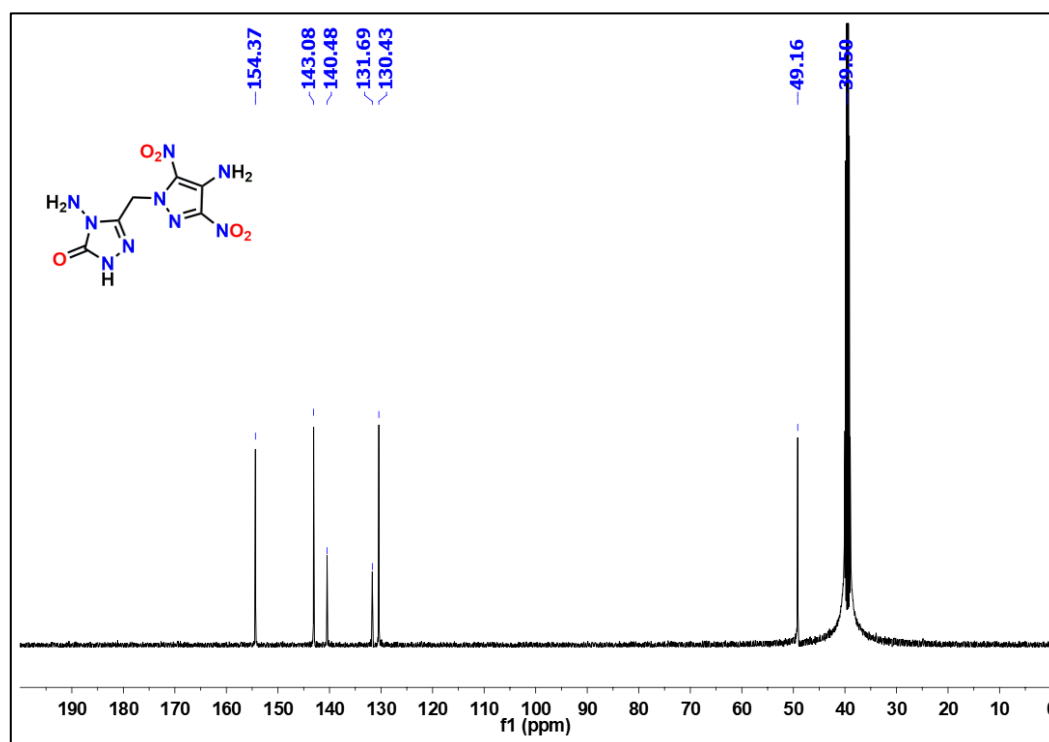

Figure S3. <sup>13</sup>C{<sup>1</sup>H} NMR Spectrum of compound **3** in DMSO-*d*<sub>6</sub> at 125 MHz.

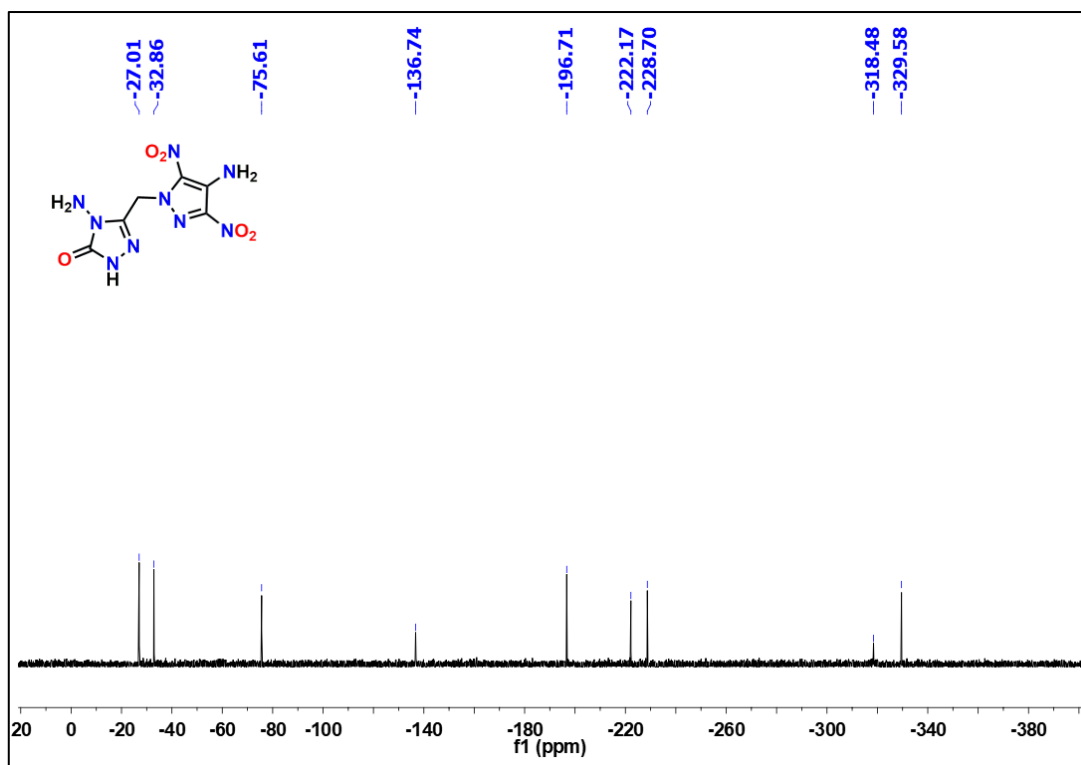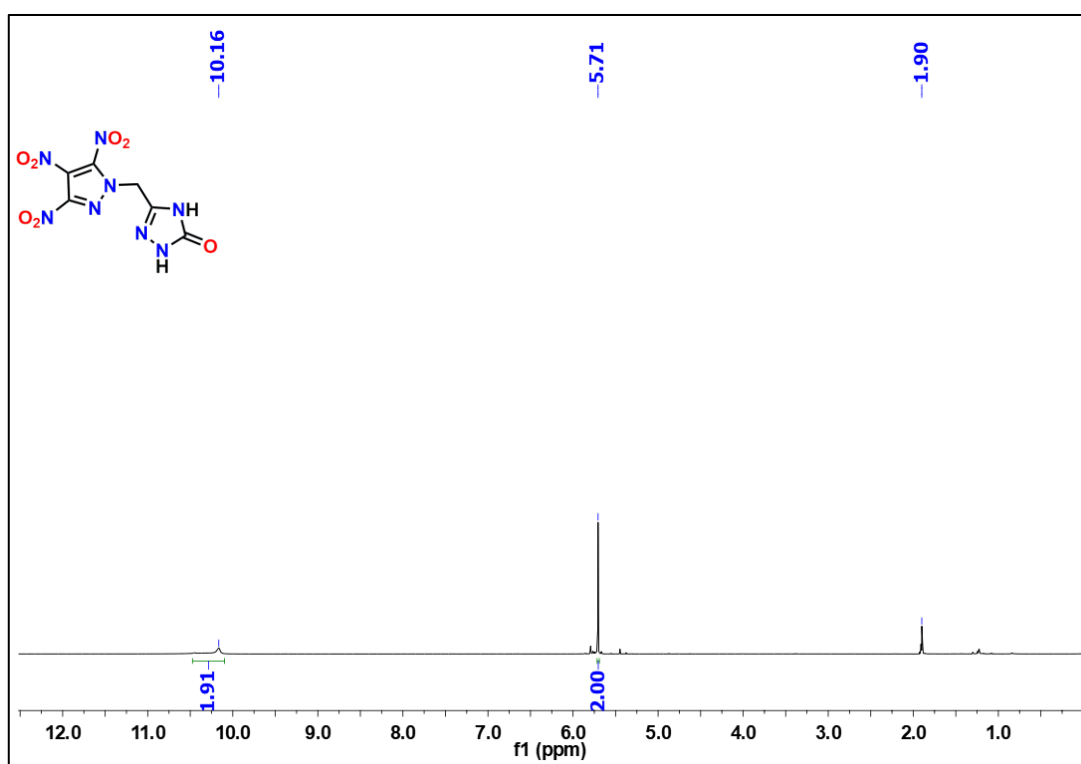

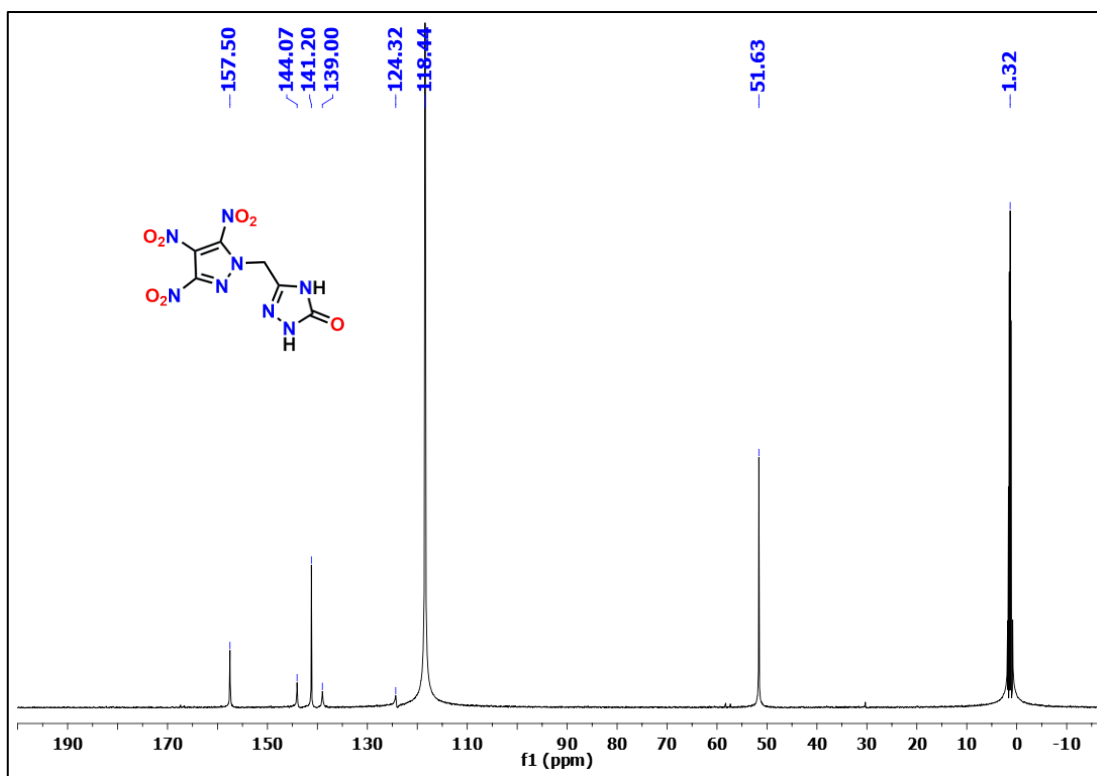

Figure S6.  $^{13}\text{C}\{^1\text{H}\}$  NMR Spectrum of compound **4** in  $\text{CD}_3\text{CN}-d_3$  at 125 MHz.

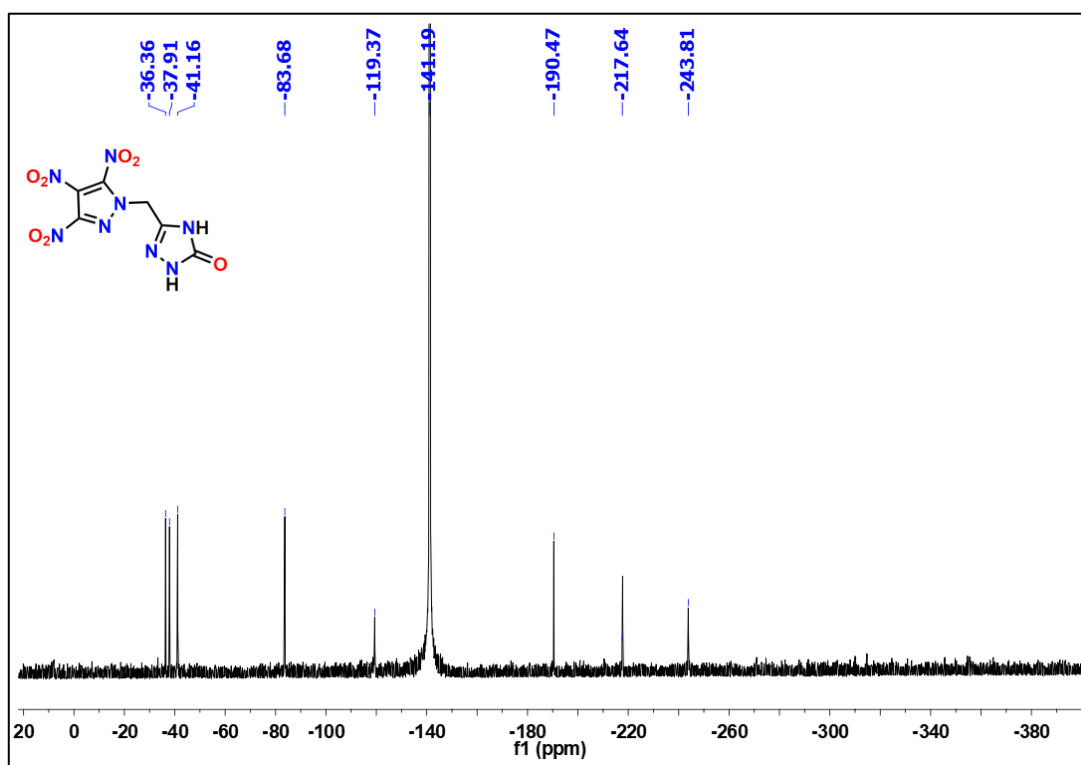

Figure S7.  $^{15}\text{N}$  NMR Spectrum of compound **4** in  $\text{CD}_3\text{CN}-d_3$  at 50.69 MHz.

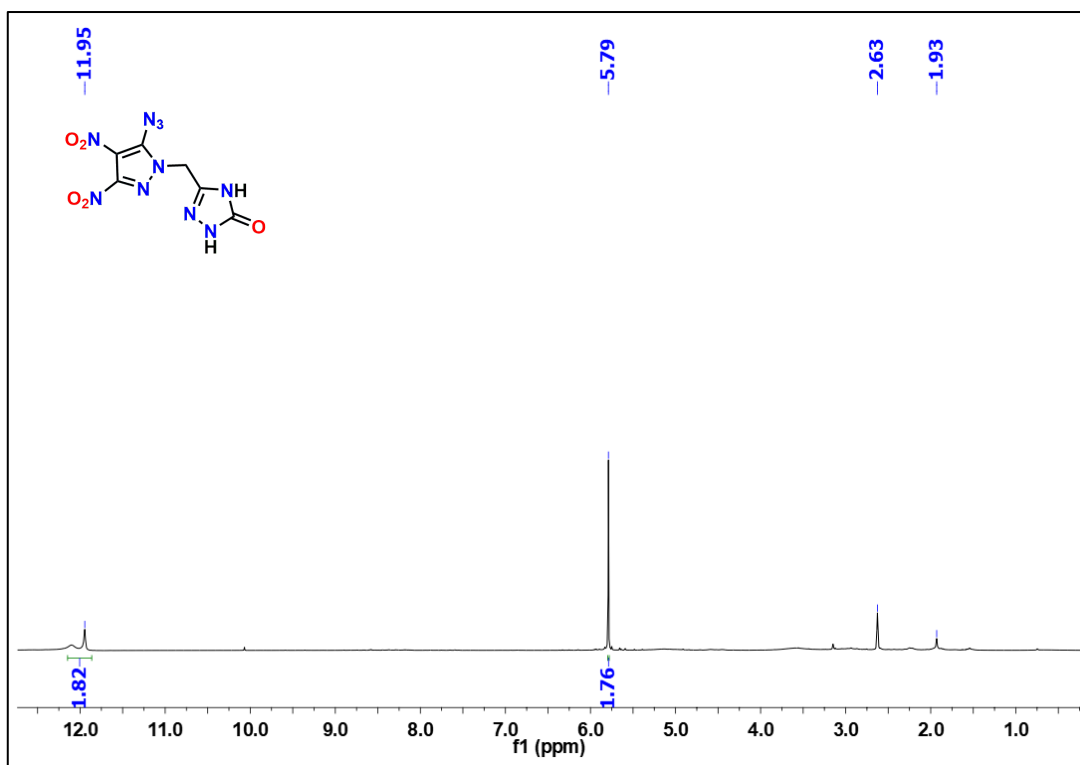

Figure S8 <sup>1</sup>H NMR Spectrum of compound 5 in CD<sub>3</sub>CN-*d*<sub>3</sub> + DMSO-*d*<sub>6</sub> at 500 MHz.

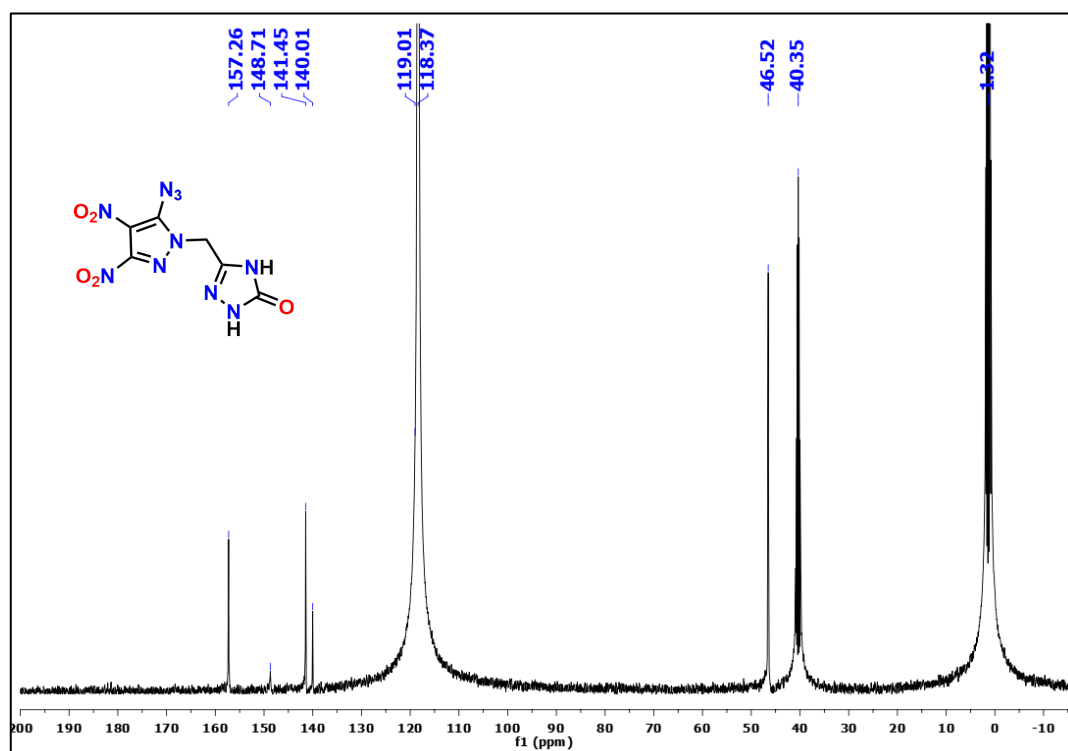

Figure S9. <sup>13</sup>C{<sup>1</sup>H} NMR Spectrum of compound 5 in CD<sub>3</sub>CN-*d*<sub>3</sub> + DMSO-*d*<sub>6</sub> at 125 MHz.

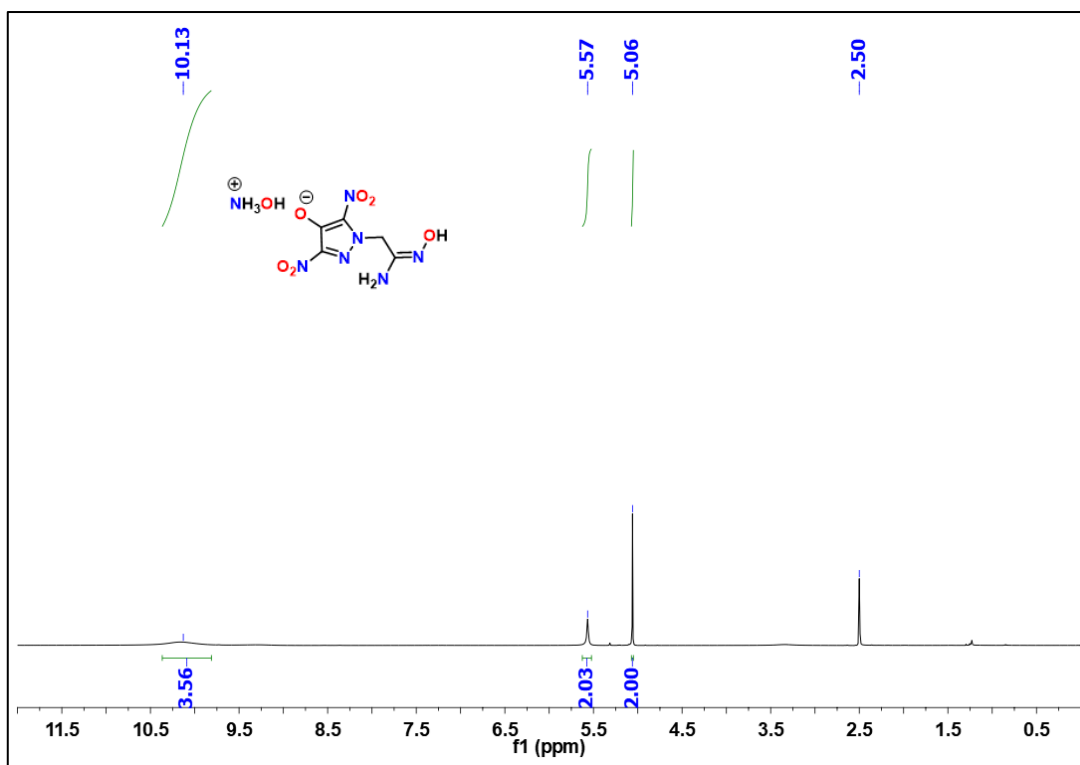

**Figure S10.**  $^1\text{H}$  NMR Spectrum of compound **7** in  $\text{DMSO-}d_6$  at 500 MHz.

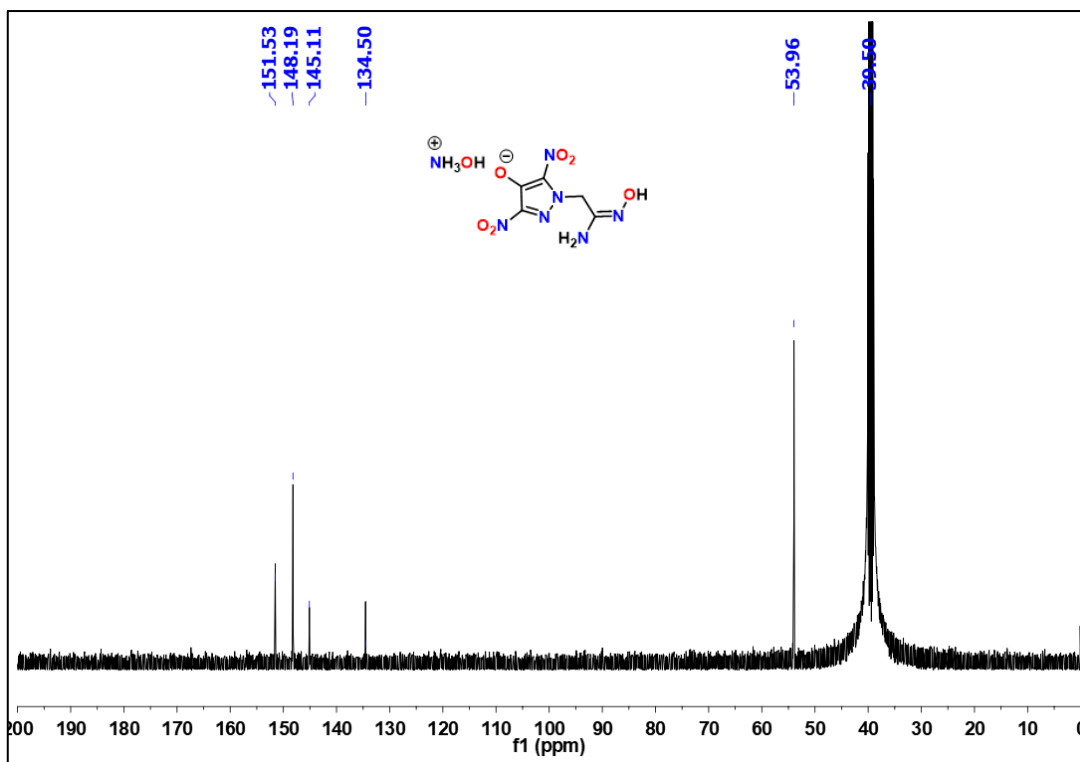

**Figure S11.**  $^{13}\text{C}\{^1\text{H}\}$  NMR Spectrum of compound **7** in  $\text{DMSO-}d_6$  at 125 MHz.

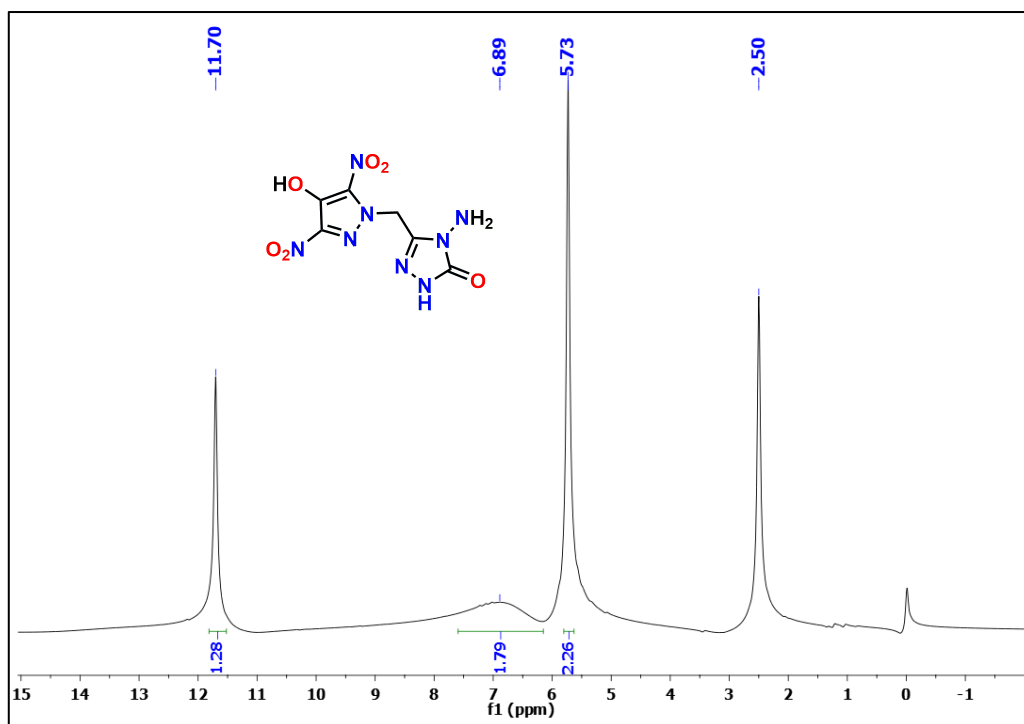

Figure S12. <sup>1</sup>H NMR Spectrum of compound **8** in DMSO-*d*<sub>6</sub> at 500 MHz.

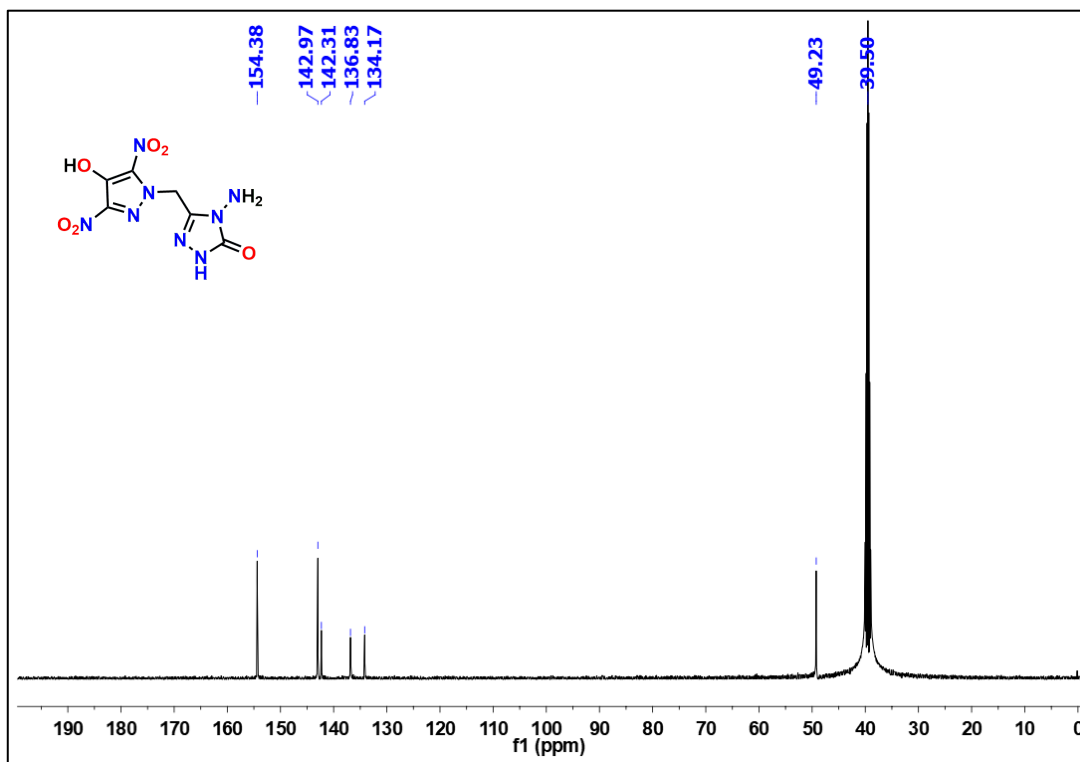

Figure S13. <sup>13</sup>C {<sup>1</sup>H} NMR Spectrum of compound **8** in DMSO-*d*<sub>6</sub> at 125 MHz.

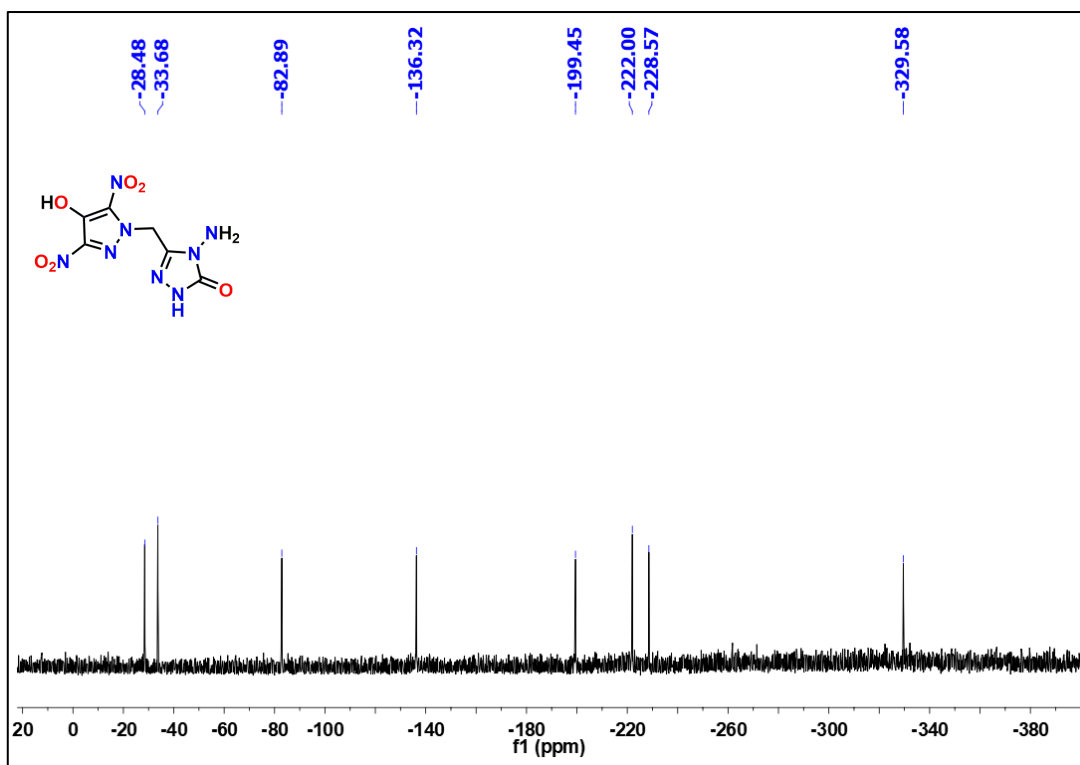

Figure S14.  $^{15}\text{N}$  NMR Spectrum of compound **8** in  $\text{DMSO-}d_6$  at 50.69 MHz.

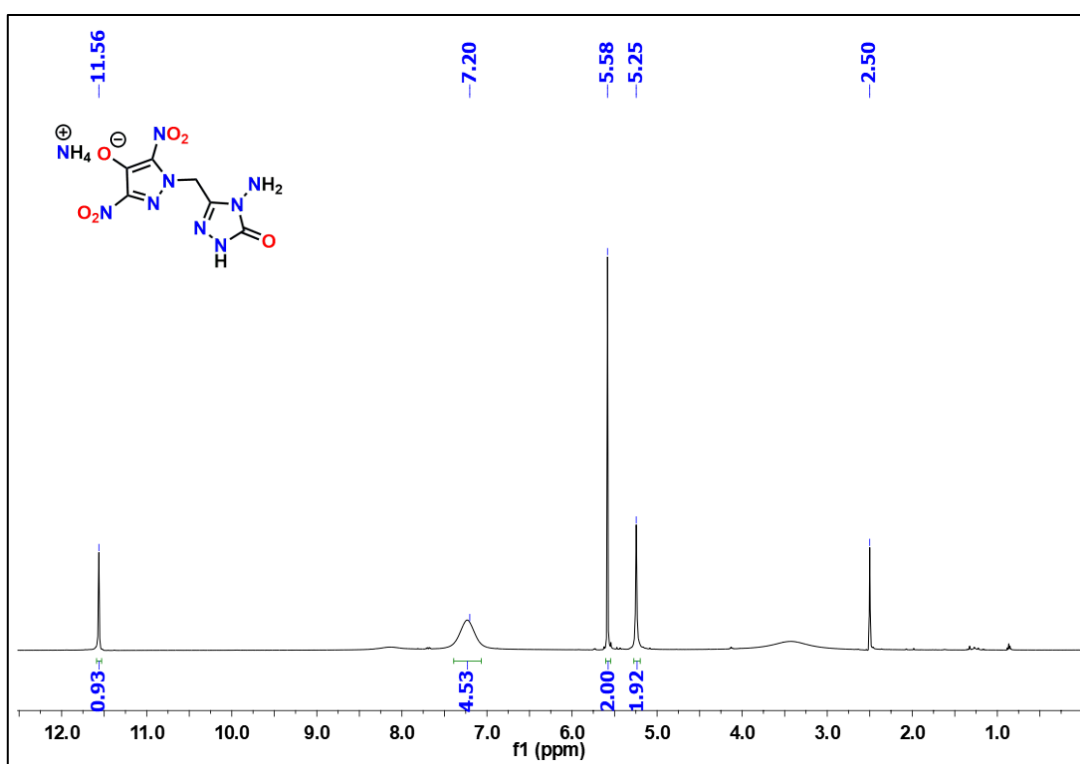

Figure S15.  $^1\text{H}$  NMR Spectrum of compound **9** in  $\text{DMSO-}d_6$  at 500 MHz.



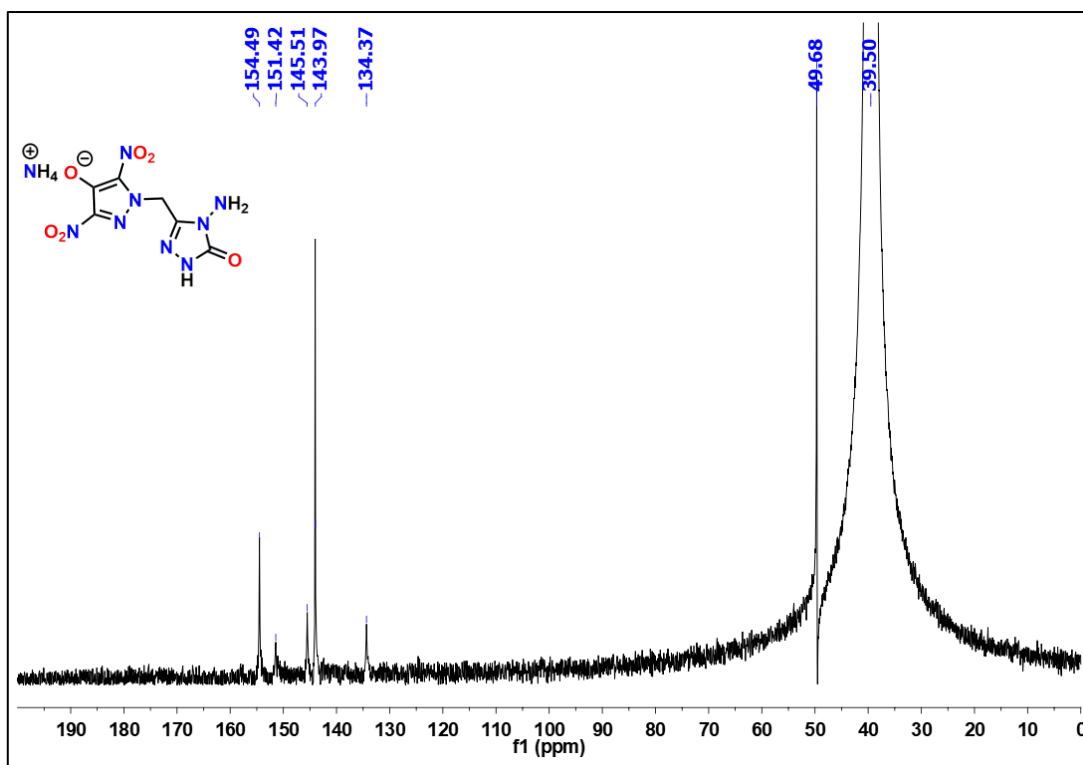

Figure S16.  $^{13}\text{C}\{^1\text{H}\}$  NMR Spectrum of compound **9** in  $\text{DMSO-}d_6$  at 125 MHz.

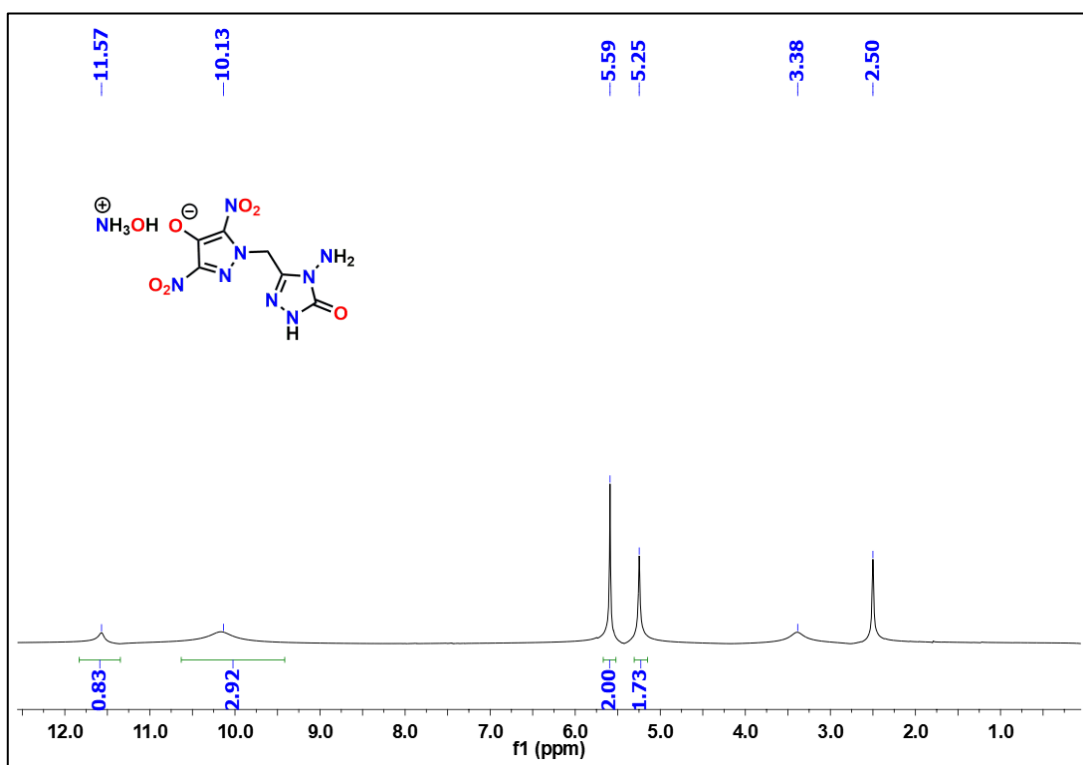

Figure S17.  $^1\text{H}$  NMR Spectrum of compound **10** in  $\text{DMSO-}d_6$  at 500 MHz.

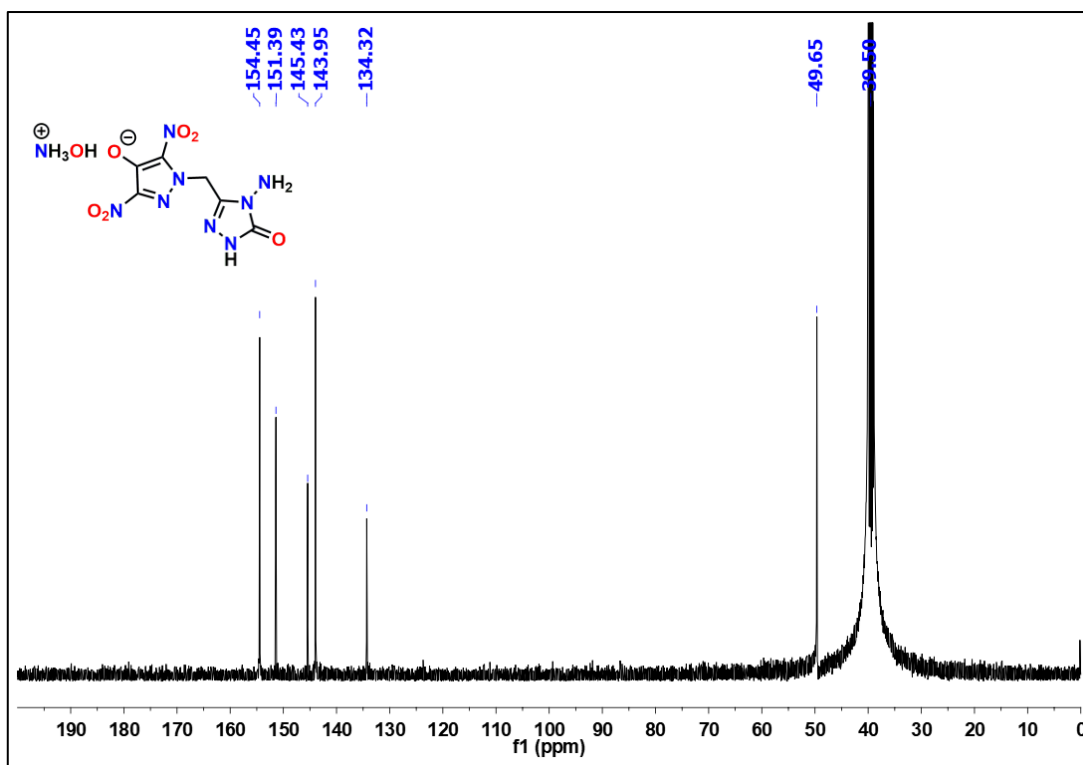

Figure S18.  $^{13}\text{C}\{^1\text{H}\}$  NMR Spectrum of compound **10** in  $\text{DMSO-}d_6$  at 125 MHz.

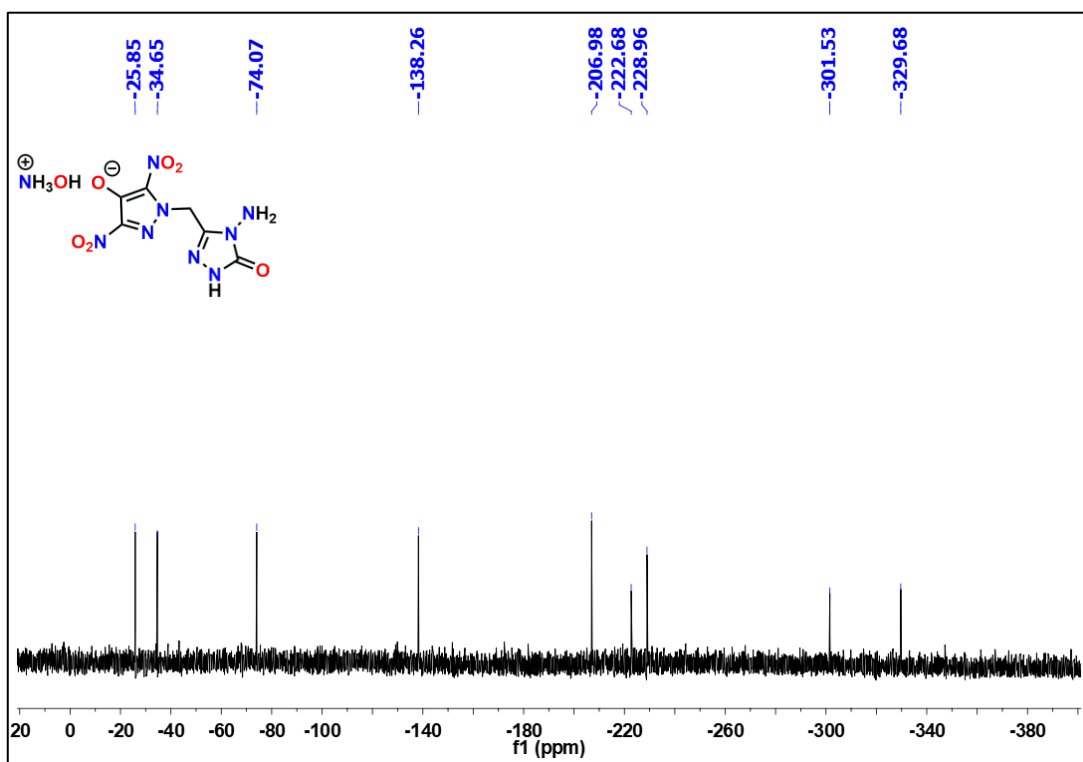

Figure S19.  $^{15}\text{N}$  NMR Spectrum of compound **10** in  $\text{DMSO-}d_6$  at 50.69 MHz.

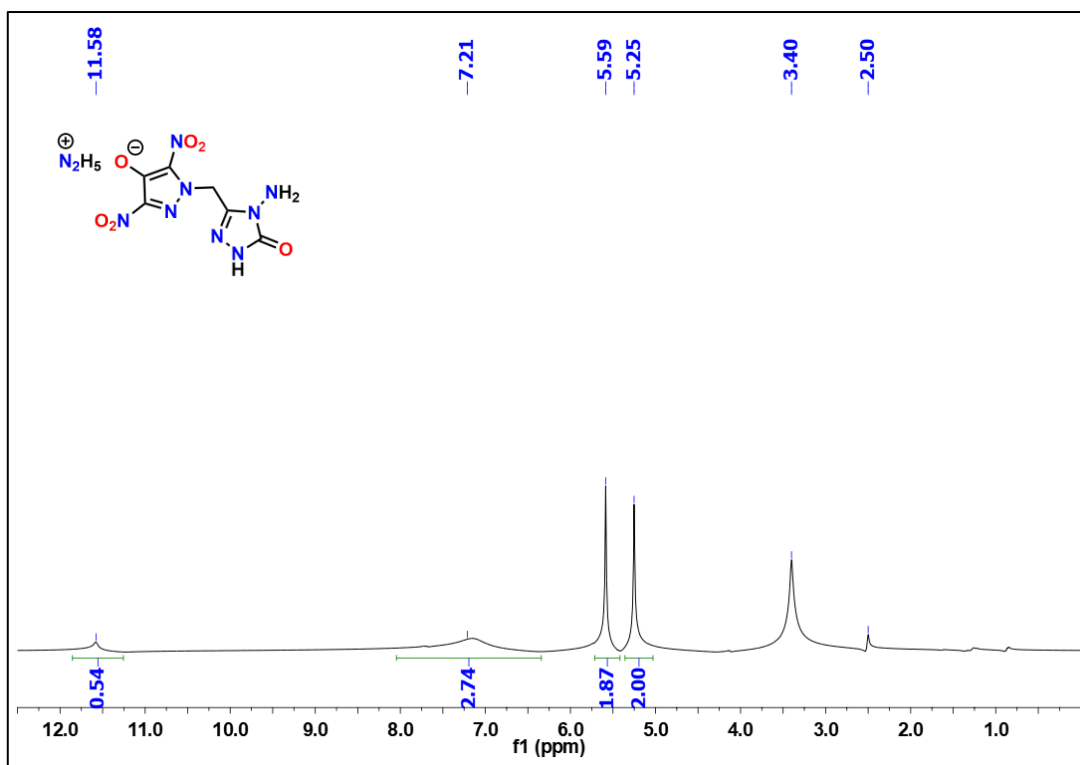

Figure S20.  $^1\text{H}$  NMR Spectrum of compound **11** in  $\text{DMSO-}d_6$  at 500 MHz.

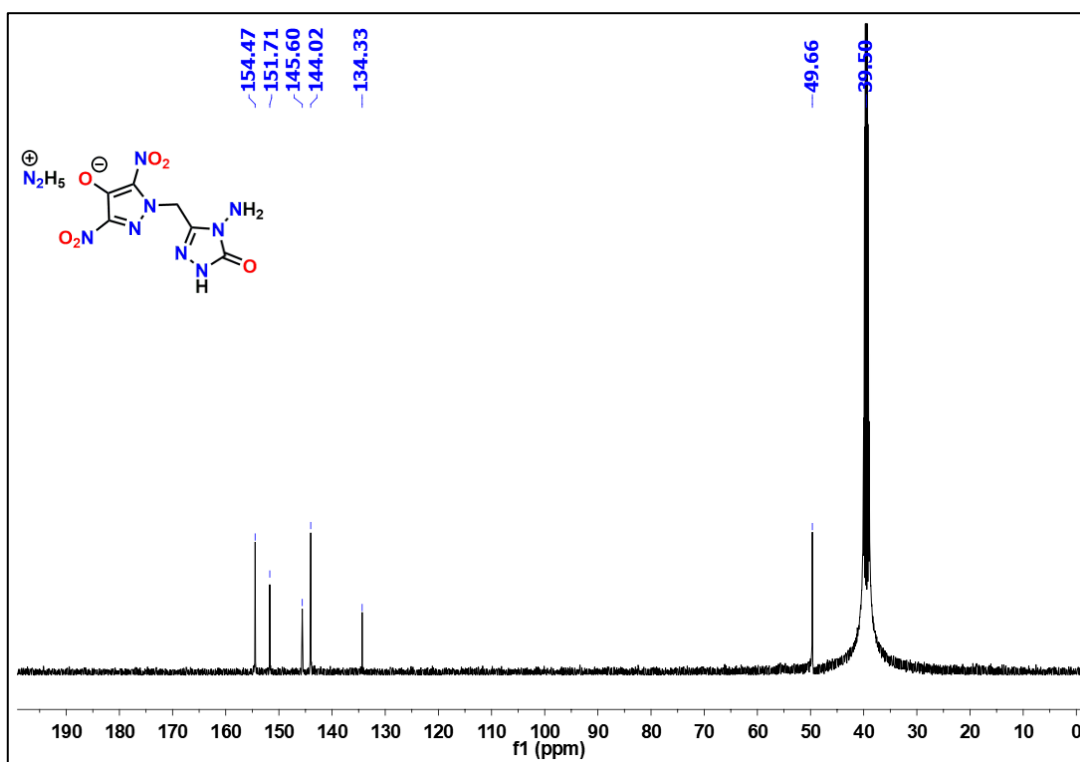

Figure S21.  $^{13}\text{C}\{^1\text{H}\}$  NMR Spectrum of compound **11** in  $\text{DMSO-}d_6$  at 125 MHz.

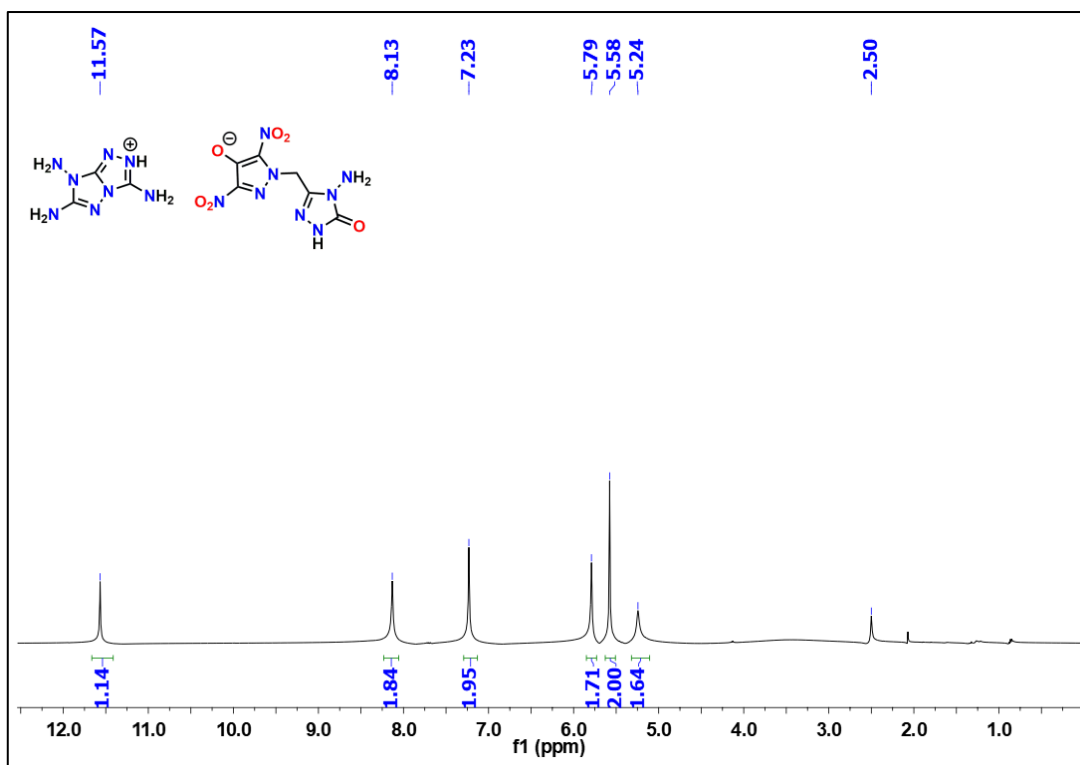

Figure S22.  $^1\text{H}$  NMR Spectrum of compound **12** in  $\text{DMSO-}d_6$  at 500 MHz.

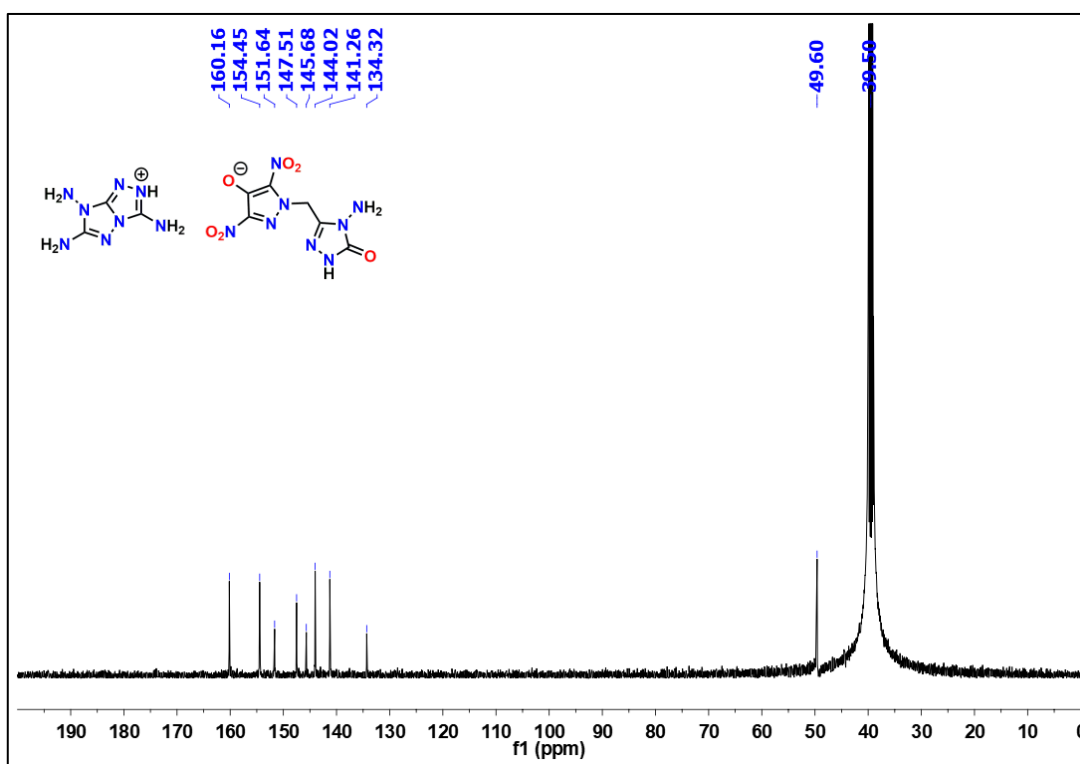

Figure S23.  $^{13}\text{C}\{^1\text{H}\}$  NMR Spectrum of compound **12** in  $\text{DMSO-}d_6$  at 125 MHz.

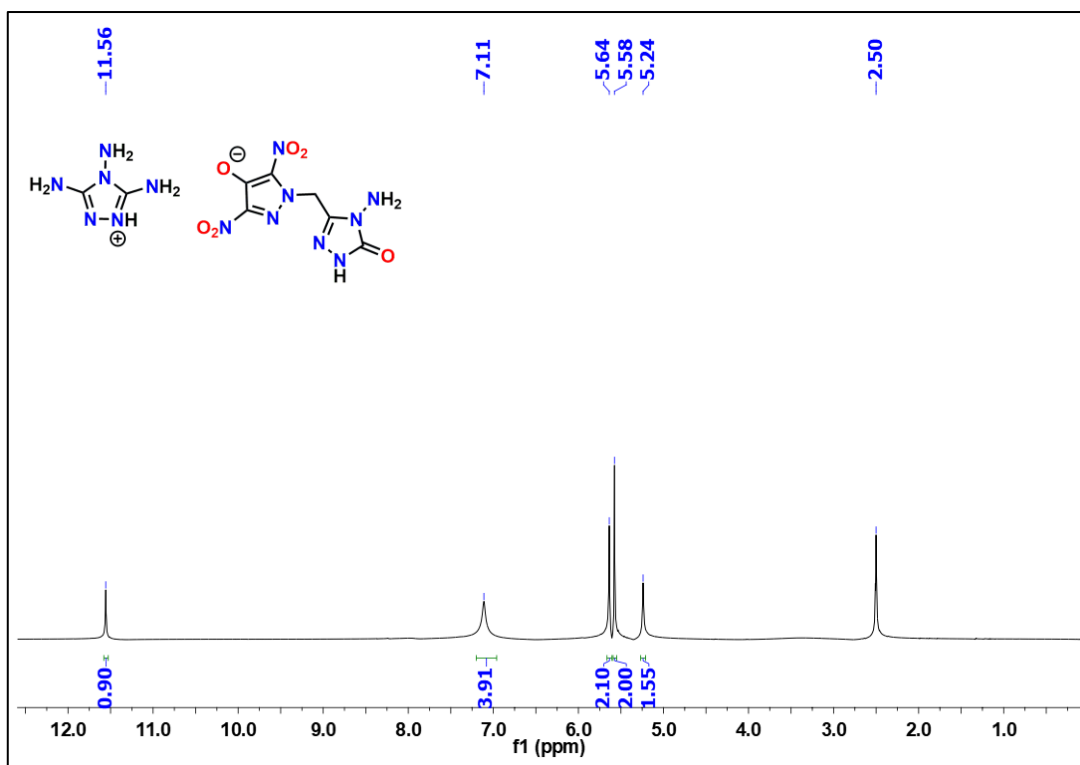

Figure S24.  $^1\text{H}$  NMR Spectrum of compound **13** in  $\text{DMSO-}d_6$  at 500 MHz.

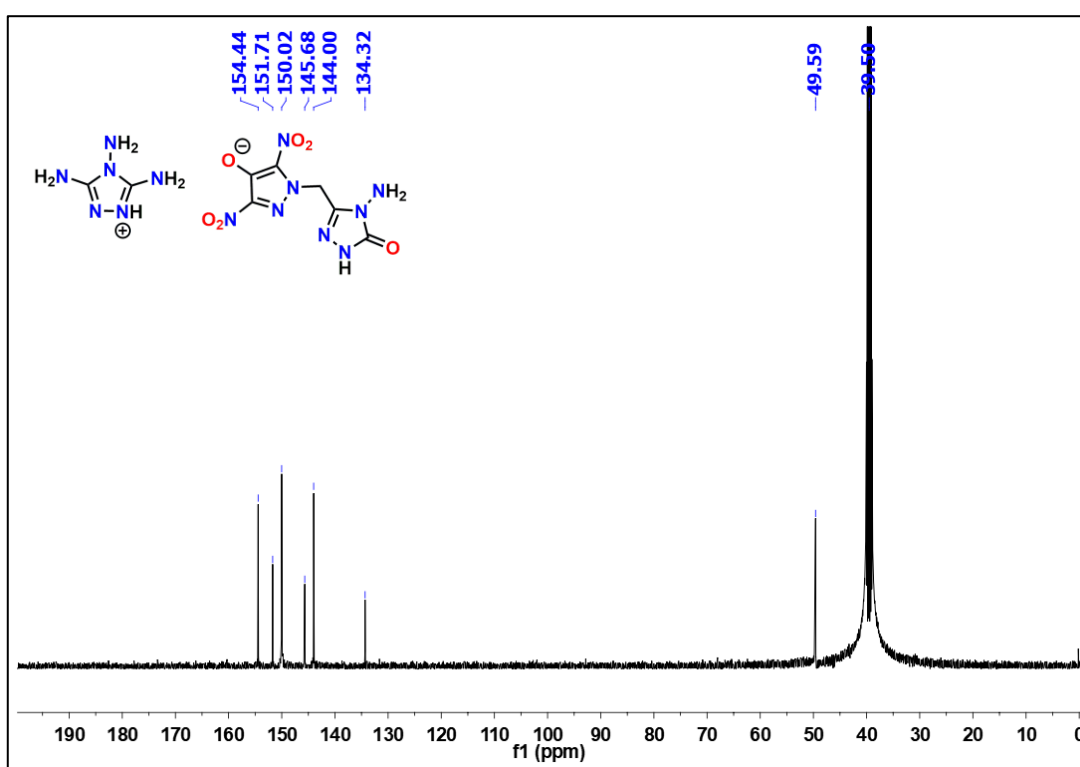

Figure S25.  $^{13}\text{C}\{^1\text{H}\}$  NMR Spectrum of compound **14** in  $\text{DMSO-}d_6$  at 125 MHz.

## 6. IR Results:

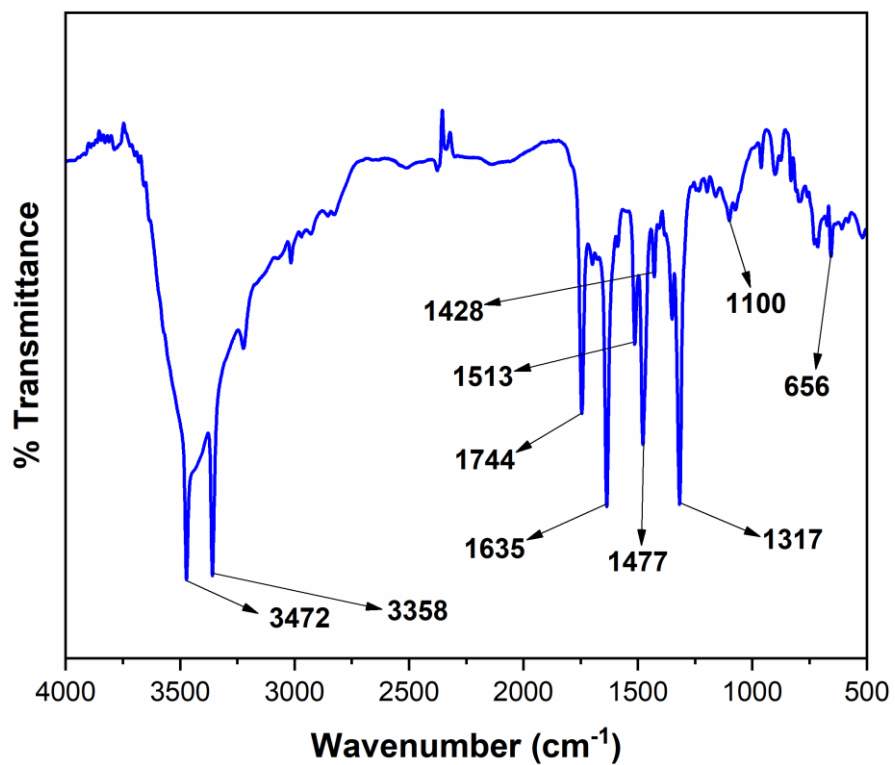

Figure S26. FTIR Spectra of compound 3.

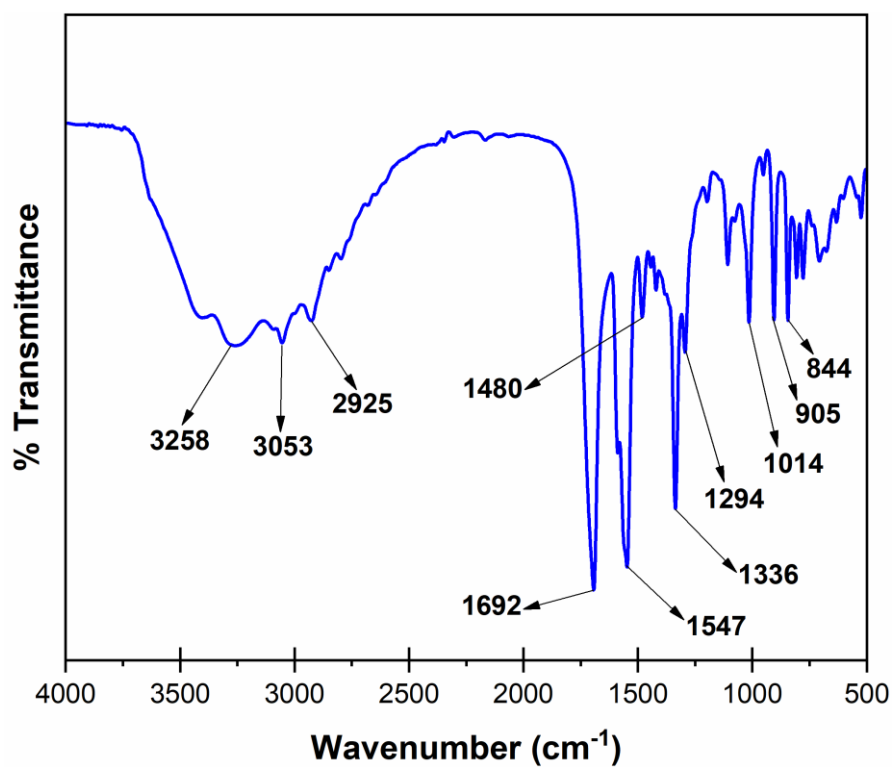

Figure S27. FTIR Spectra of compound 4.

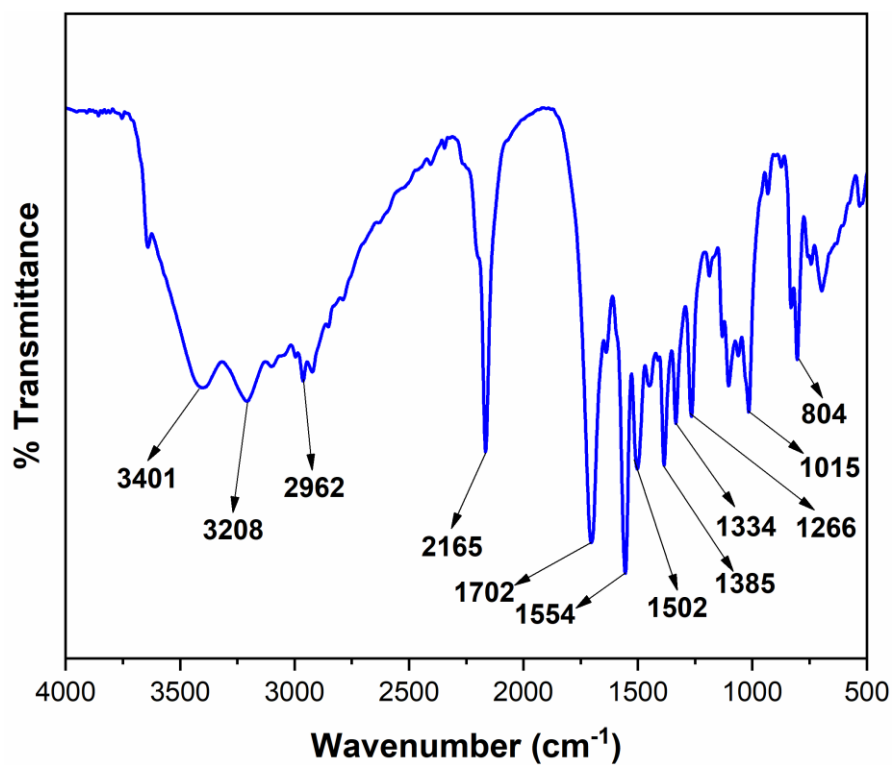

Figure S28. FTIR Spectra of compound 5.

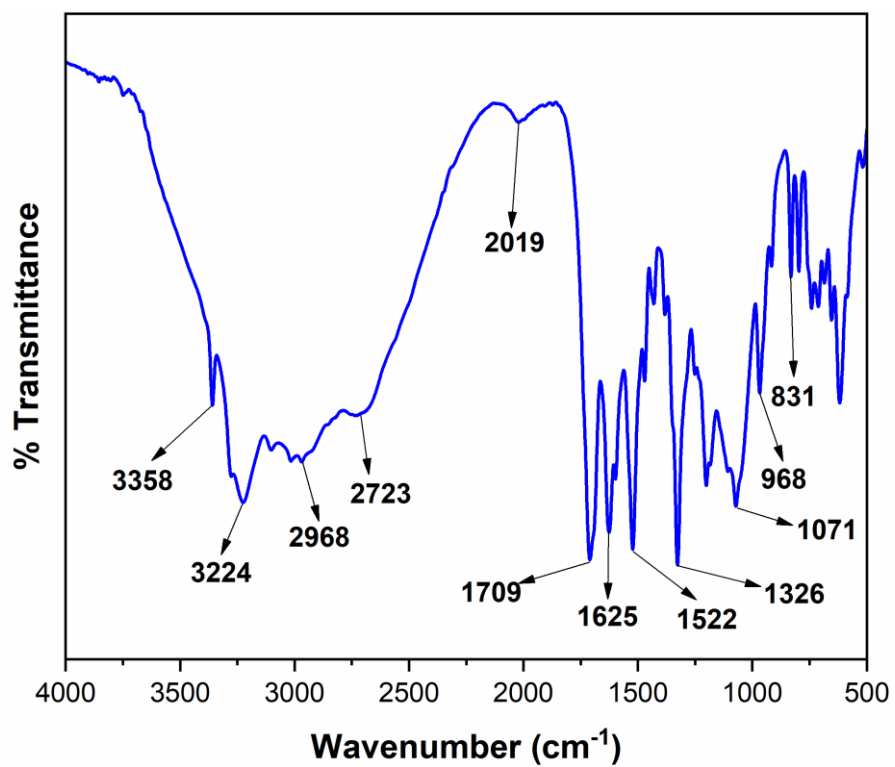

Figure S29. FTIR Spectra of compound 8.

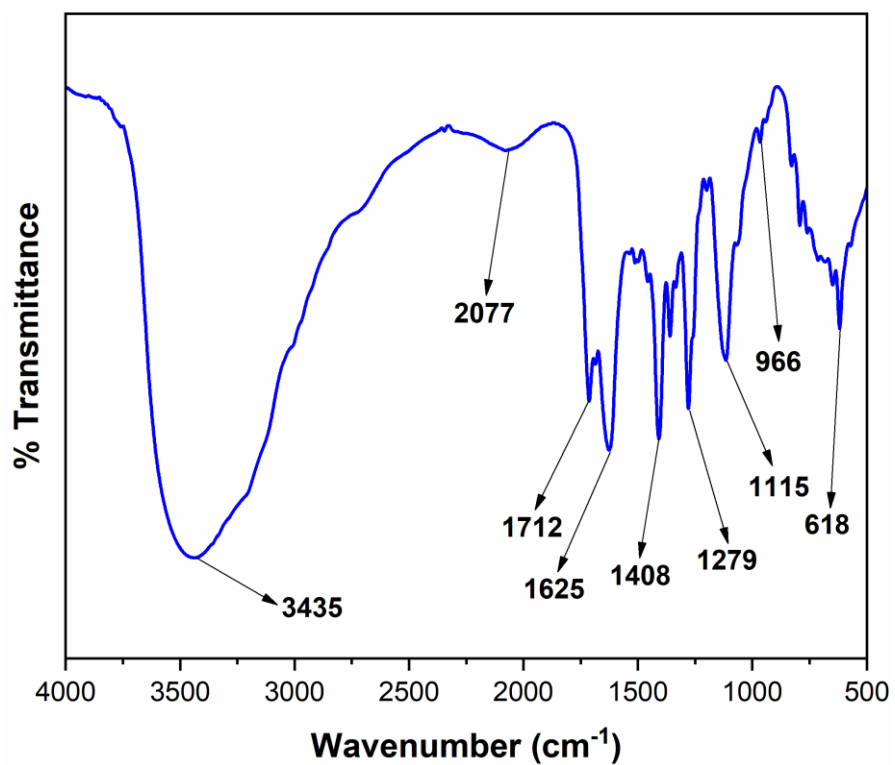

Figure S30. FTIR Spectra of compound 9.

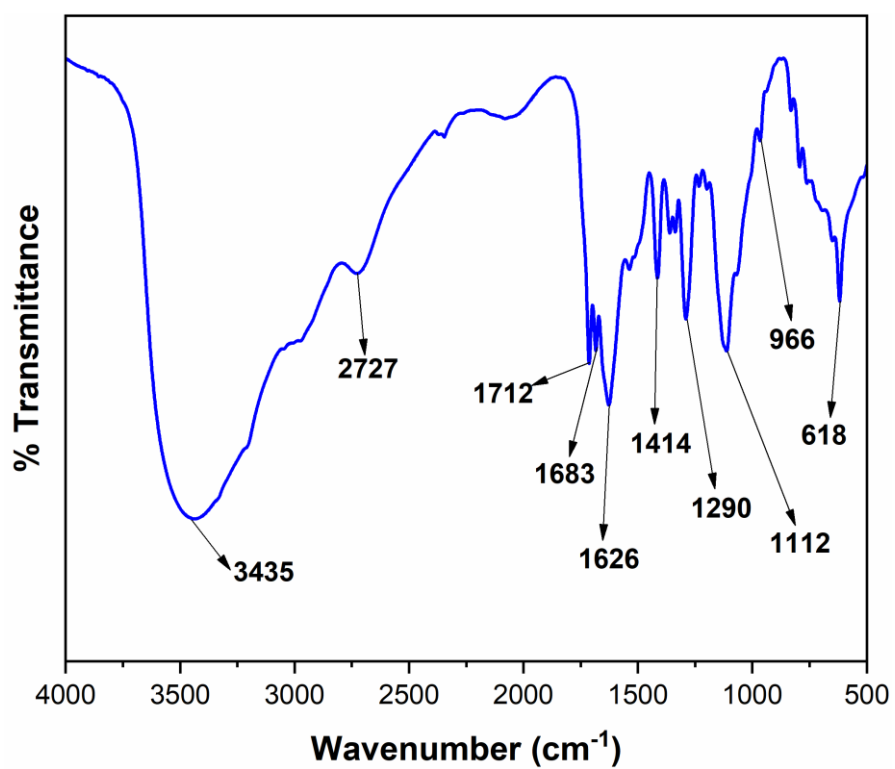

Figure S31. FTIR Spectra of compound 10.



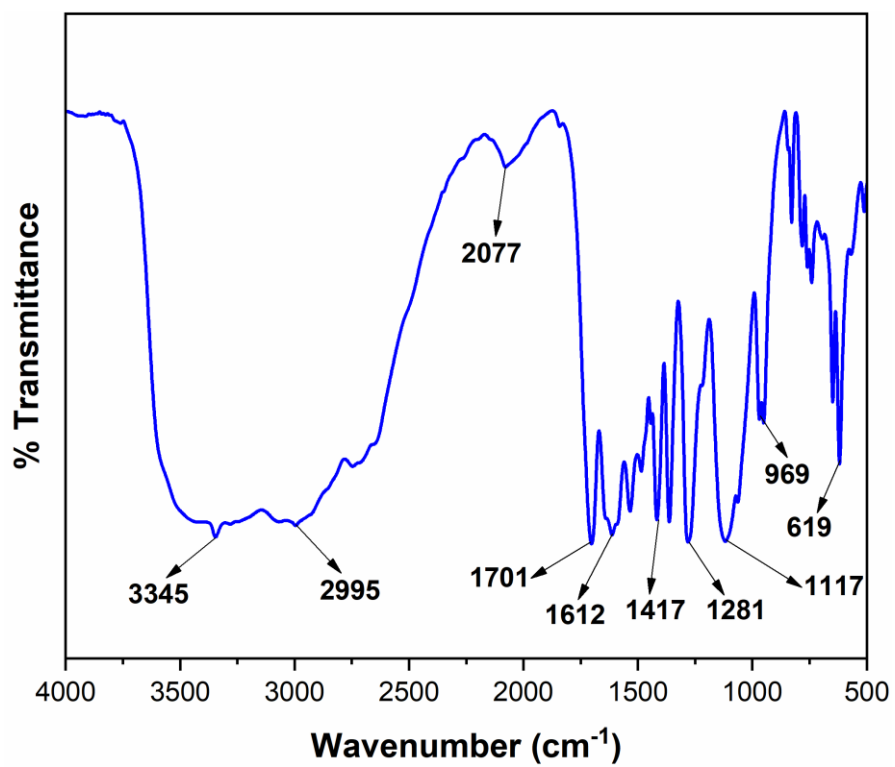

Figure S32. FTIR Spectra of compound 11.

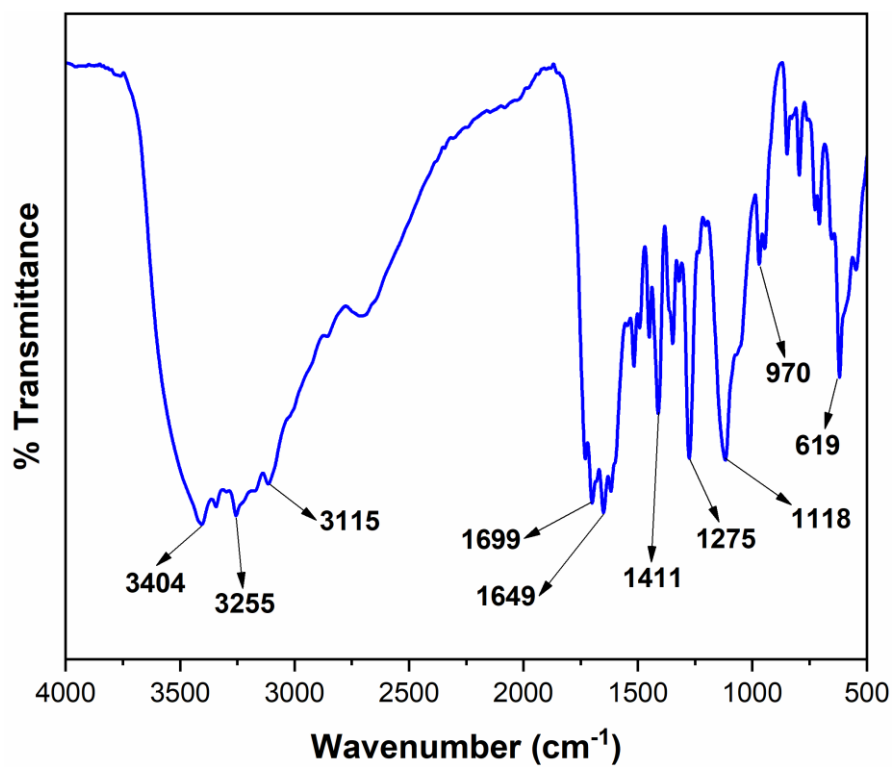

Figure S33. FTIR Spectra of compound 12.

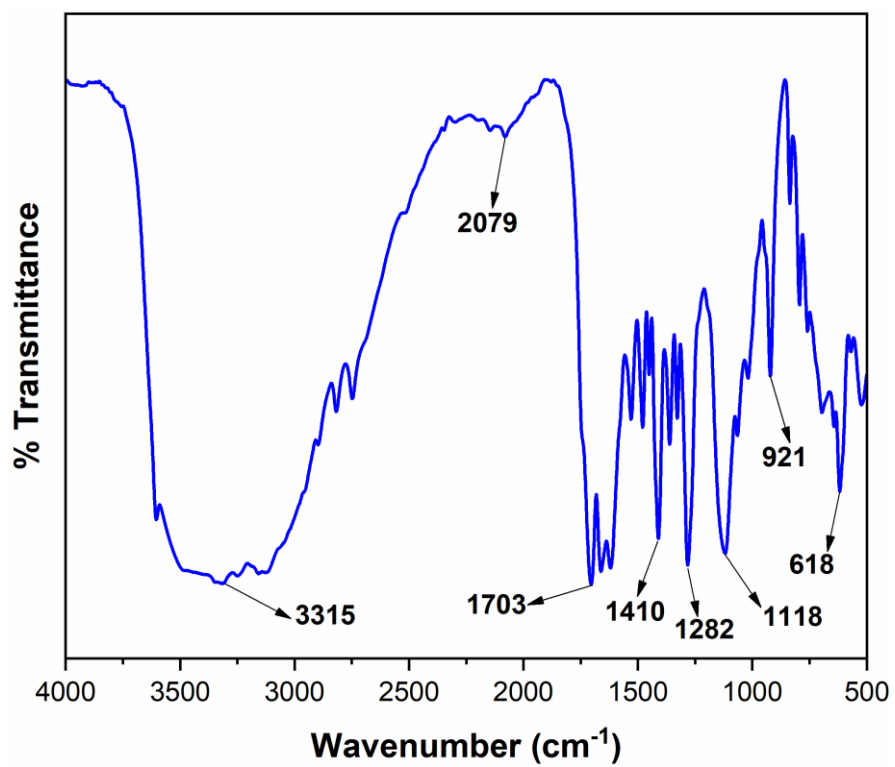

**Figure S34.** FTIR Spectra of compound **13**.

## 7. DSC Results:

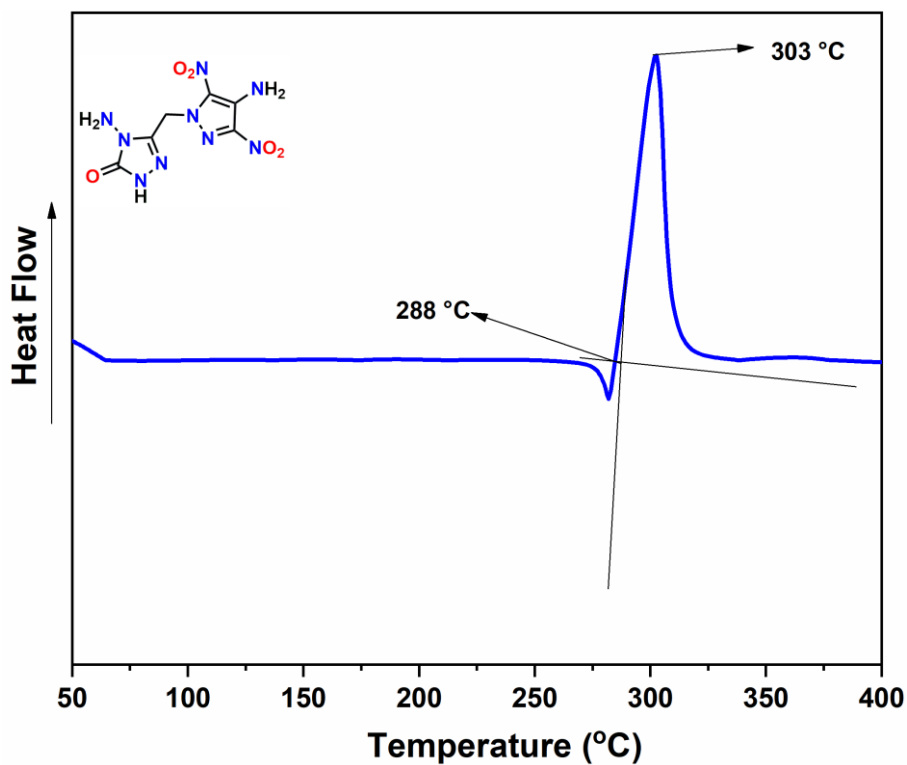

Figure S35. DSC curve of compound 3 at heating rate 5 °C/min.

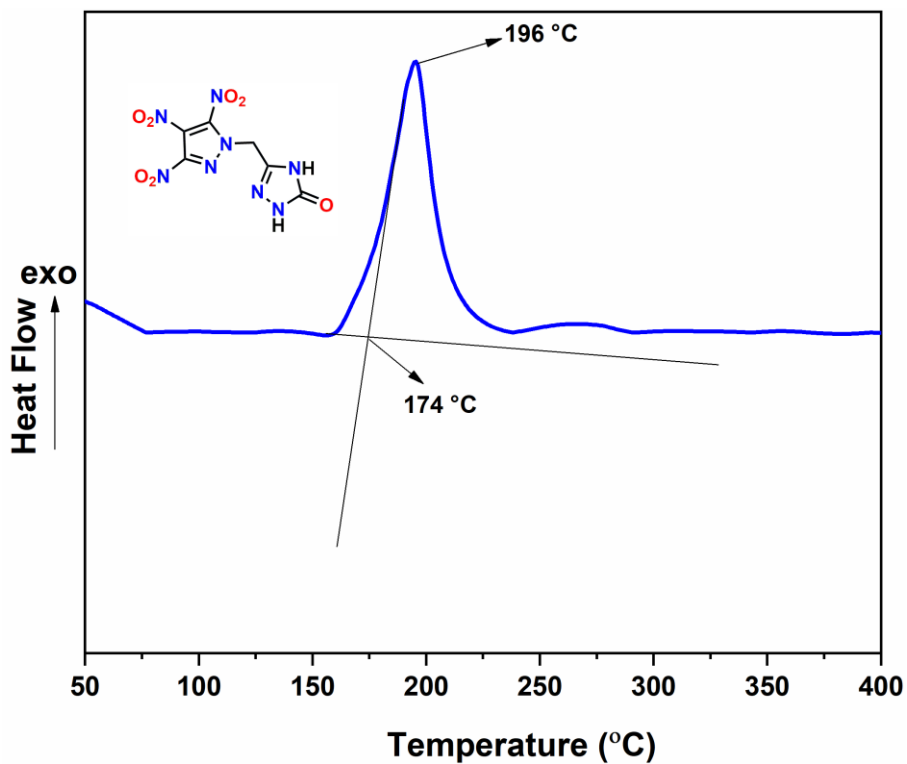

Figure S36. DSC curve of compound 4 at heating rate 5 °C/min.

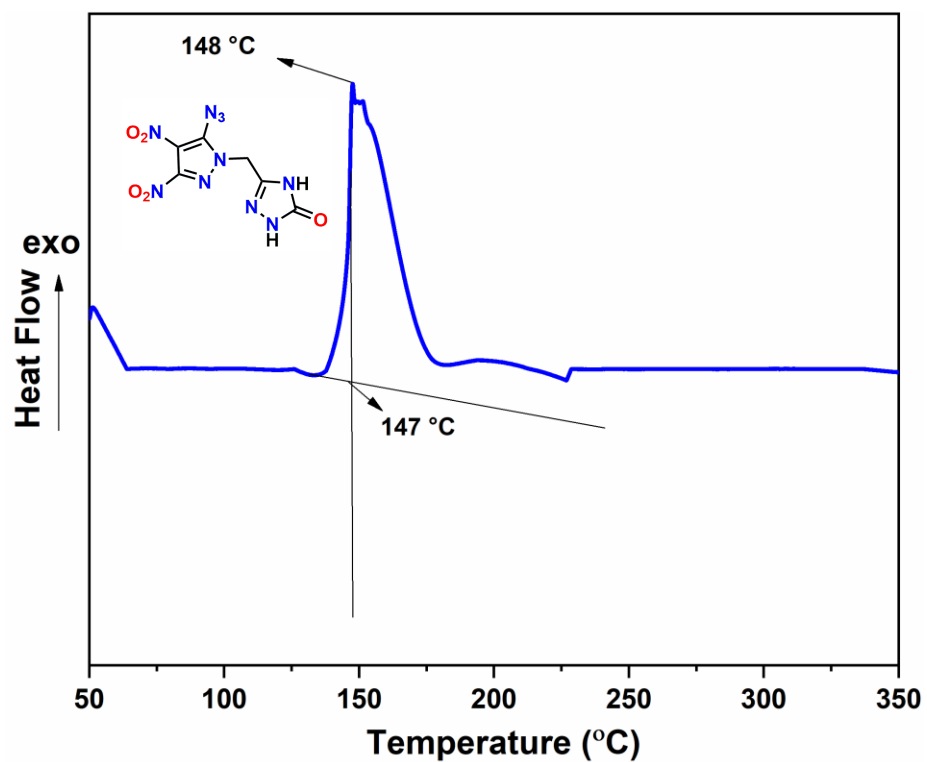

Figure S37. DSC curve of compound 5 at heating rate 5 °C/min.

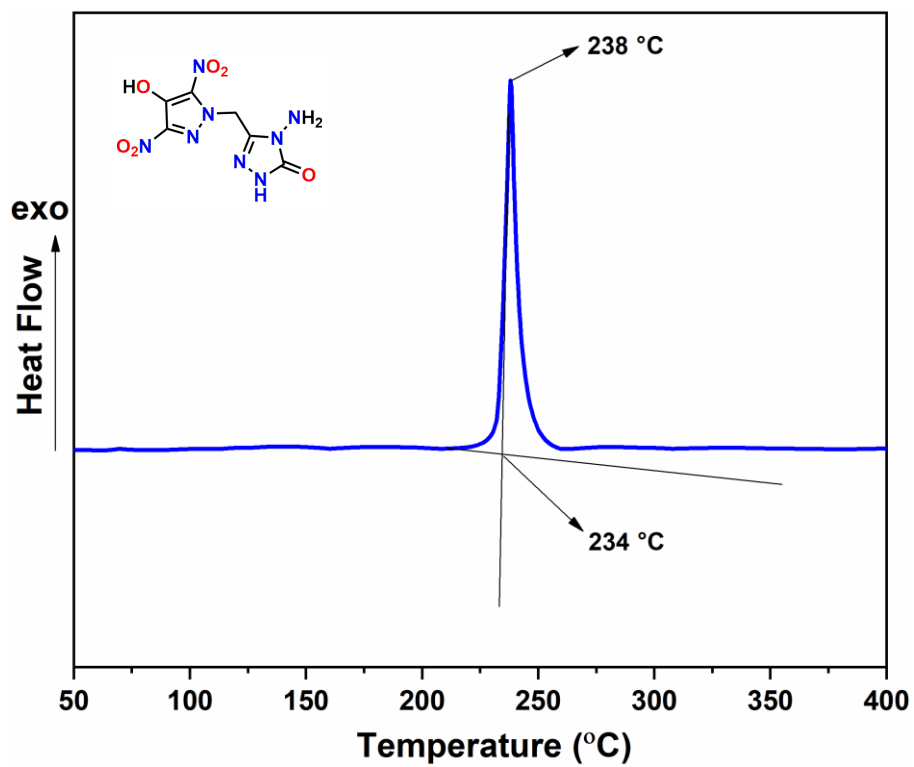

Figure S38. DSC curve of compound 8 at heating rate 5 °C/min.

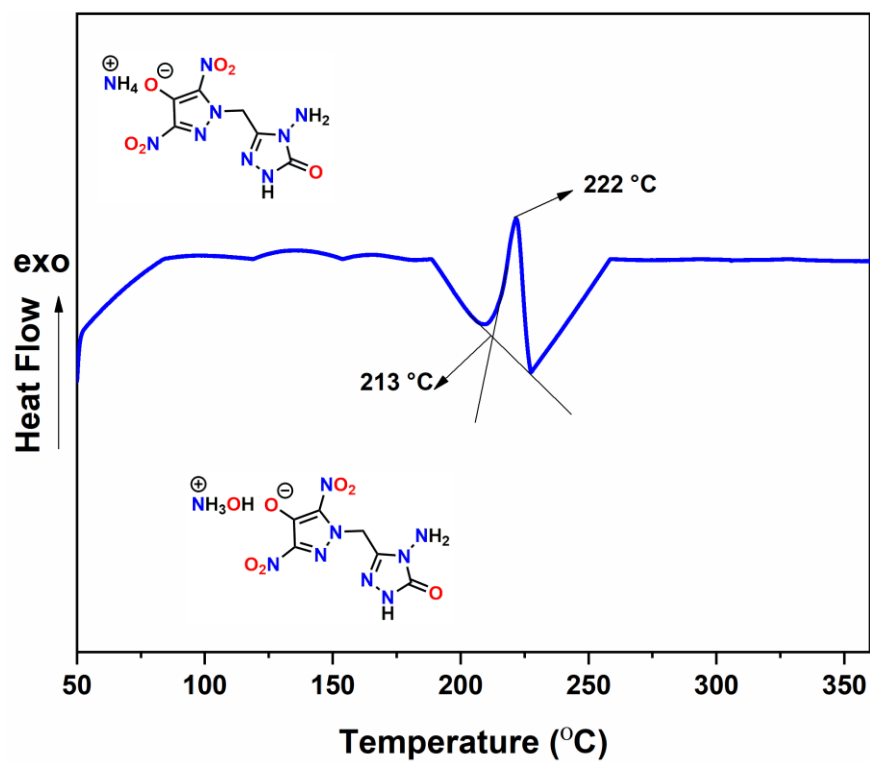

Figure S39. DSC curve of compound **9** at heating rate 5 °C/min.

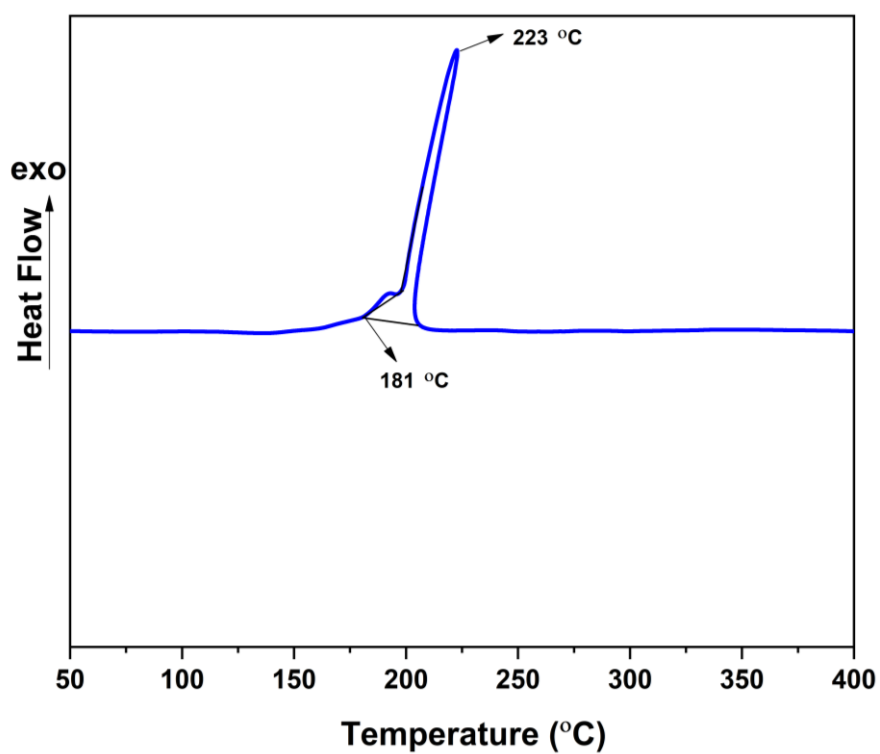

Figure S40. DSC curve of compound **10** at heating rate 5 °C/min.

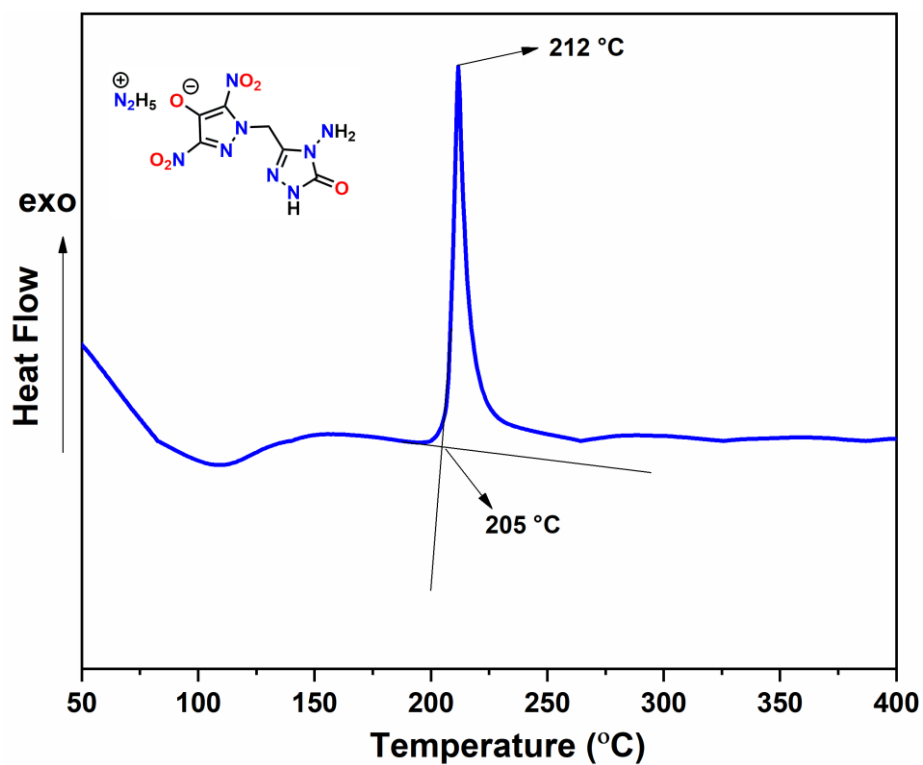

Figure S41. DSC curve of compound **11** at heating rate 5 °C/min.

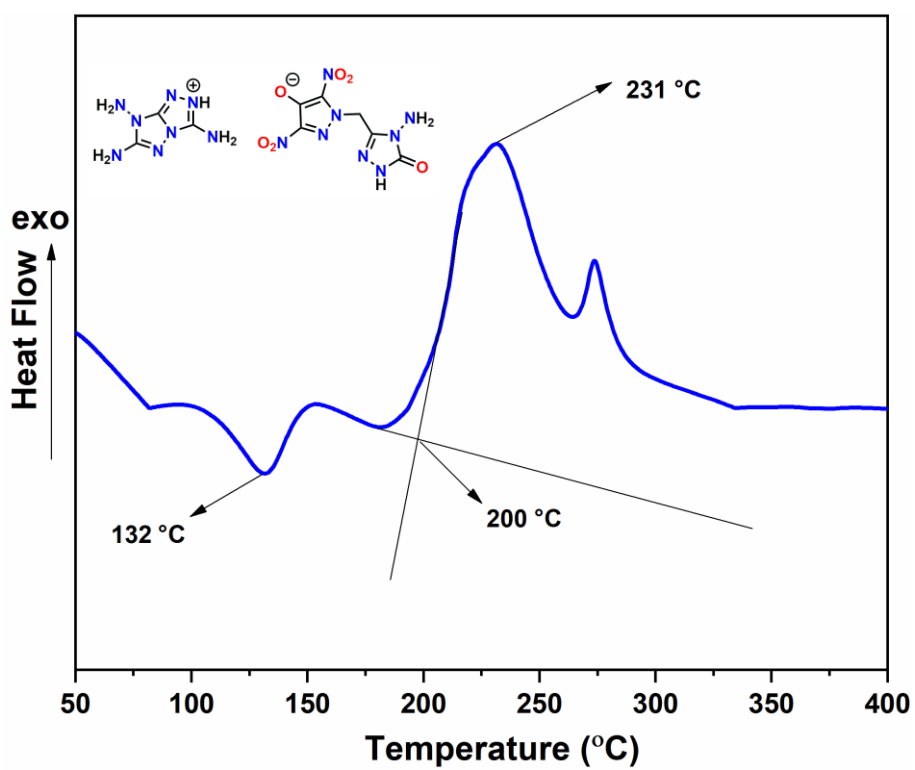

Figure S42. DSC curve of compound **12** at heating rate 5 °C/min.

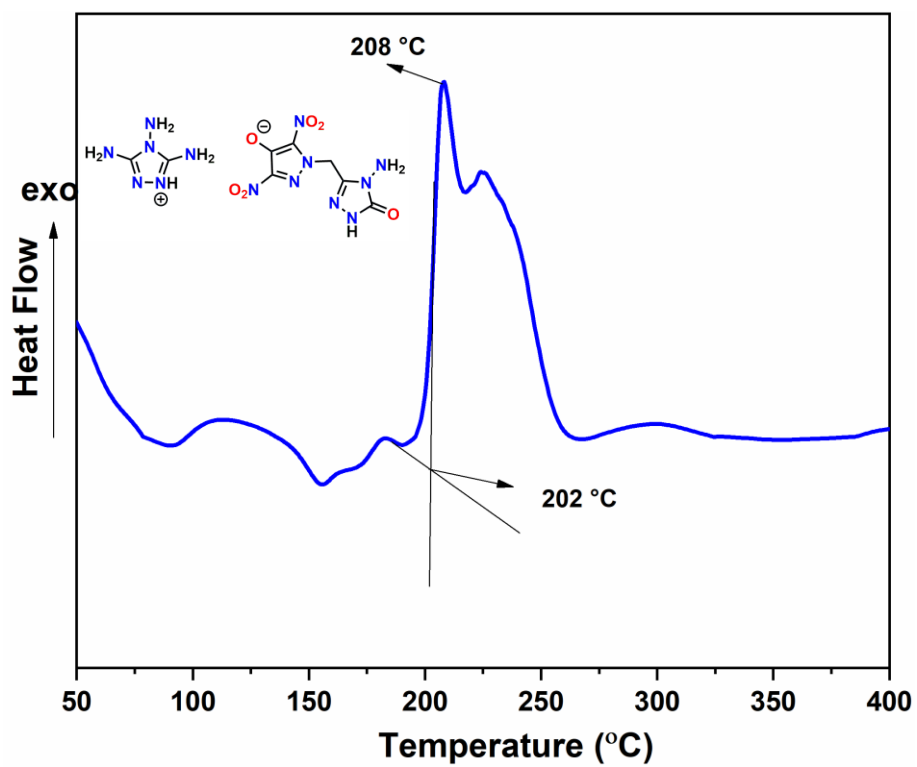

Figure S43. DSC curve of compound **13** at heating rate 5 °C/min.

## 8. Mass Results:

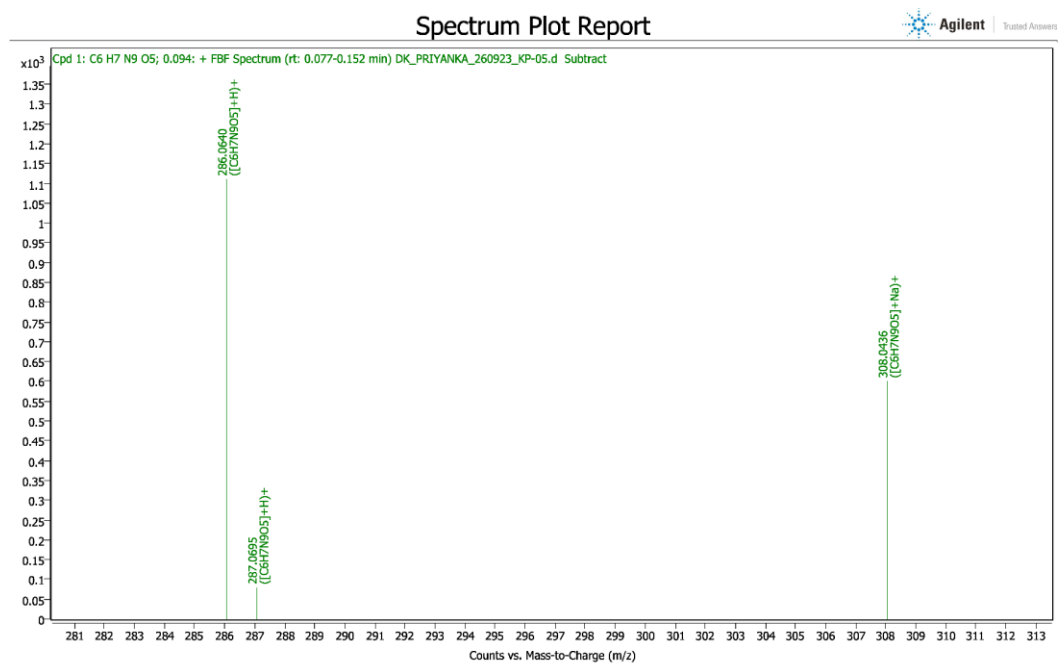

Figure S44. Mass Spectrum of Compound 3.

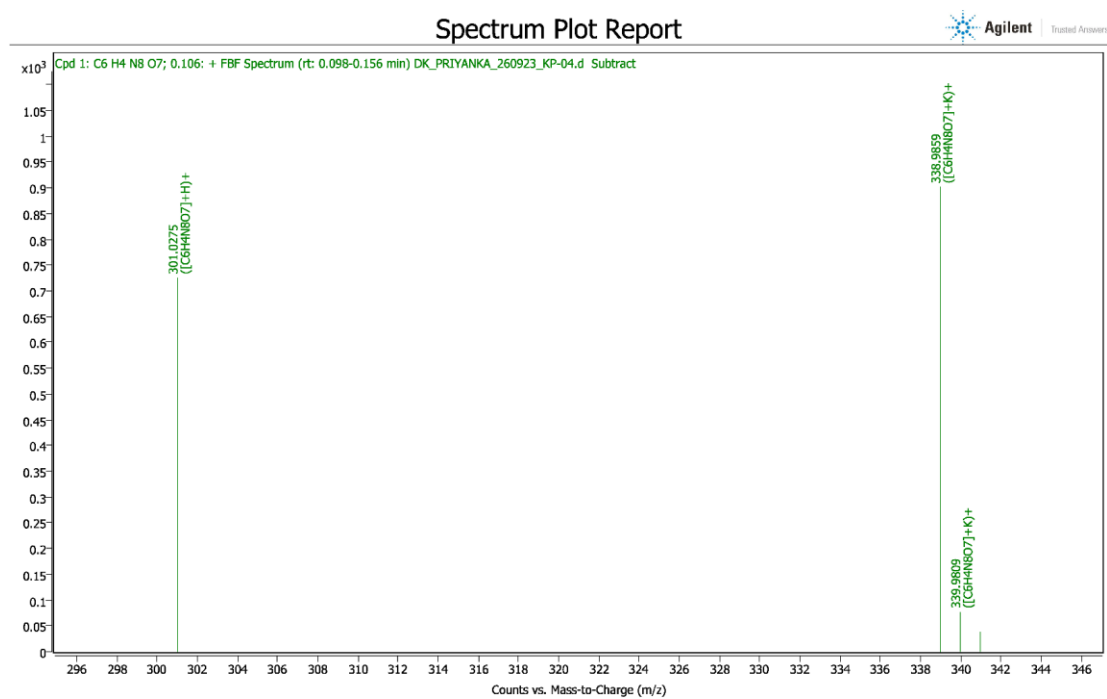

Figure S45. Mass Spectrum of Compound 4.



## Spectrum Plot Report

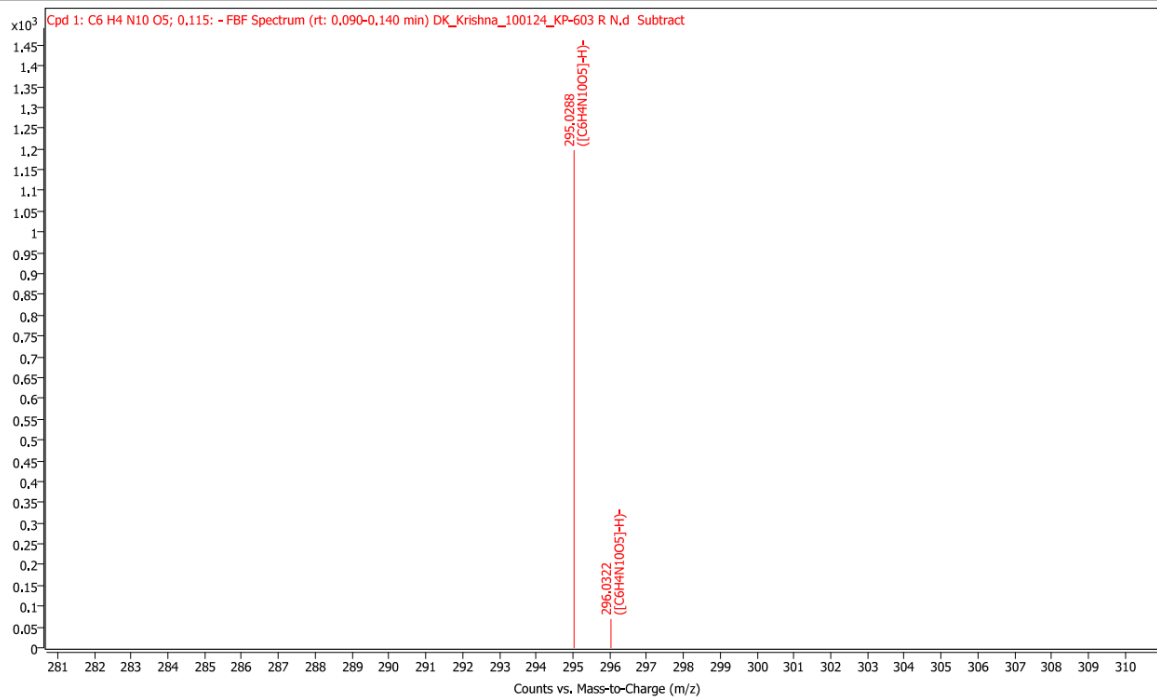

Figure S46. Mass Spectrum of Compound 5.

## Spectrum Plot Report

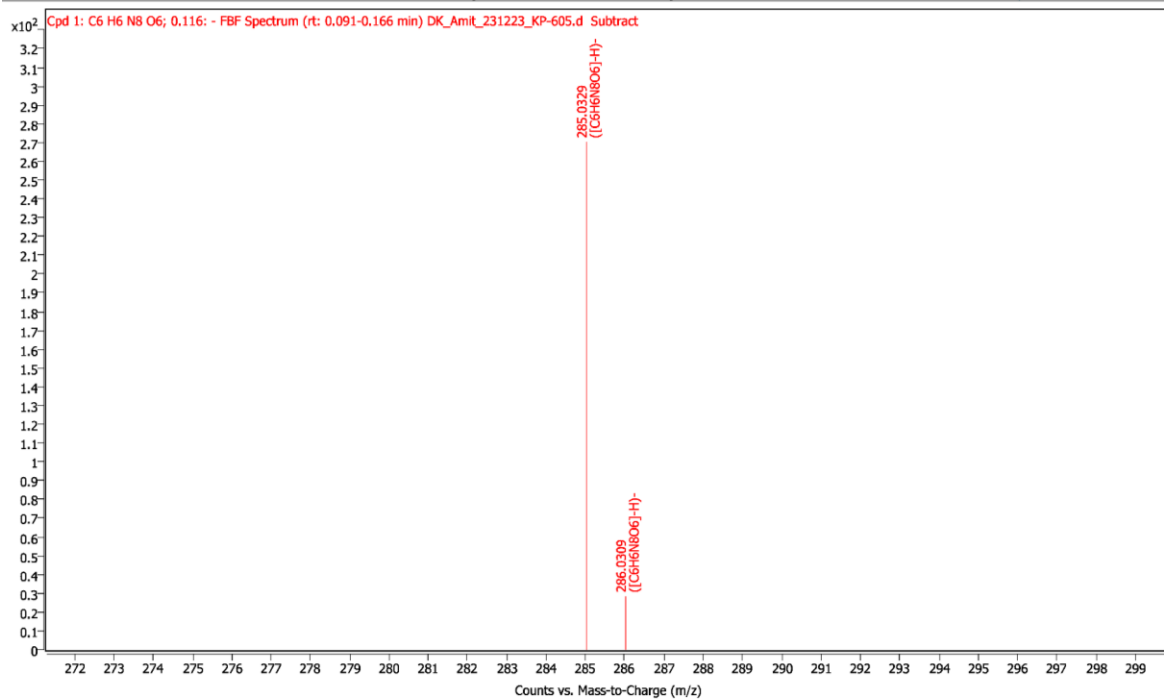

Figure S47. Mass Spectrum of Compound 8.
